# Supplementary material
Source: PubMed Central journal article supplement (PMC9269630)
Supplement: CJN.16801221-SupplementaryData1.pdf [file CJN.16801221-SupplementaryData1.pdf]

# SUPPLEMENTAL DATA

## Histological Predictors of Outcome in C3 Glomerulopathy and Idiopathic immunoglobulin-associated Membranoproliferative Glomerulonephritis

Hannah J. Lomax-Browne<sup>1</sup>, Nicholas R. Medjeral-Thomas<sup>1</sup>, Sean J. Barbour<sup>2</sup>, Jack Gisby<sup>1</sup> Heedeok Han<sup>3</sup>, Andrew S. Bomback<sup>3</sup>, Fernando C. Fervenza<sup>4</sup>, Thomas H. Cairns<sup>5</sup>, Richard Szydlo<sup>6</sup>, Sven-Jean Tan<sup>7</sup>, Stephen D. Marks<sup>8</sup>, Aoife M Waters<sup>8</sup>, Gerald B. Appel<sup>3</sup>, Vivette D. D'Agati<sup>9</sup>, Sanjeev Sethi<sup>10</sup>, Cynthia C. Nast<sup>11</sup>, Ingeborg Bajema<sup>12</sup>, Charles E. Alpers<sup>13</sup>, Agnes B. Fogo<sup>14</sup>, Christoph Licht<sup>15</sup>, Fadi Fakhouri<sup>16</sup>, Daniel C. Cattran<sup>17</sup>, James E. Peters<sup>1</sup>, H. Terence Cook<sup>1</sup>, Matthew C. Pickering<sup>1</sup>.

<sup>1</sup>Centre for Inflammatory Disease, Imperial College London, UK; <sup>2</sup>University of British Columbia, Vancouver, Canada; <sup>3</sup>Department of Medicine, Division of Nephrology, Columbia University Irving Medical Center, New York, NY, USA; <sup>4</sup>Division of Nephrology and Hypertension, Mayo Clinic, Rochester, Minnesota, USA; <sup>5</sup>West London Renal and Transplant Centre, Imperial College Healthcare NHS Trust, London, UK; <sup>6</sup>Centre for Haematology, Imperial College London, London, UK; <sup>7</sup>Department of Nephrology, The Royal Melbourne Hospital, Victoria, Australia; <sup>8</sup>Department of Paediatric Nephrology, Great Ormond Street Hospital for Children NHS Foundation Trust, London, UK and NIHR Great Ormond Street Hospital Biomedical Research Centre, University College London Great Ormond Street Institute of Child Health, London, UK; <sup>9</sup>Department of Pathology and Cell Biology, Columbia University Irving Medical Center, New York, NY, USA; <sup>10</sup>Department of Laboratory Medicine and Pathology, Mayo Clinic, Rochester, Minnesota, USA; <sup>11</sup>Cedars-Sinai Medical Center, Los Angeles, California, USA; <sup>12</sup>Department of Pathology, Leiden University Medical Center, Leiden, The Netherlands; <sup>13</sup>Department of Laboratory Medicine and Pathology, University of Washington, Seattle, Washington, USA; <sup>14</sup>Department of Pathology, Microbiology and Immunology, Vanderbilt University School of Medicine, Nashville, Tennessee, USA; <sup>15</sup>Division of Nephrology, The Hospital for Sick Children, Toronto, Ontario, Canada; <sup>16</sup>Service of Nephrology and Hypertension, Department of Medicine, Lausanne University Hospital and University of Lausanne, Lausanne, Switzerland; <sup>17</sup>Toronto General Research Institute, Division of Nephrology, University of Toronto, Toronto, Canada.

| CONTENTS                                                                                                                                     | Page  |
|----------------------------------------------------------------------------------------------------------------------------------------------|-------|
| <b>Supplemental Figure 1.</b> Proteinuria and outcome free survival.                                                                         | 3     |
| <b>Supplemental Figure 2.</b> Outcome free survival in the whole cohort by individual histological score quartiles.                          | 4-5   |
| <b>Supplemental Figure 3.</b> Outcome free survival in the C3 glomerulopathy cohort by individual histological score quartiles.              | 6-7   |
| <b>Supplemental Figure 4.</b> Progression to a combined outcome event.                                                                       | 8-9   |
| <b>Supplemental Figure 5.</b> Histograms of the histological scores in 156 baseline kidney biopsies.                                         | 10    |
| <b>Supplemental Figure 6.</b> Histograms of the histological scores in 123 baseline kidney biopsies with C3G.                                | 11    |
| <b>Supplemental Figure 7.</b> Histograms of the histological scores in 33 baseline kidney biopsies with Ig-MPGN.                             | 12    |
| <b>Supplemental Figure 8.</b> Correlation between histological variables, eGFR, proteinuria, activity and chronicity scores.                 | 13-14 |
| <b>Supplemental Figure 9.</b> Scatterplots of eGFR vs Proteinuria and histological features in the whole cohort.                             | 15    |
| <b>Supplemental Figure 10.</b> Scatterplots of Proteinuria vs eGFR and histological features in the whole cohort.                            | 16    |
| <b>Supplemental Figure 11.</b> Biopsy features over time.                                                                                    | 17-19 |
| <b>Supplemental Figure 12.</b> Outcome free survival in the whole and C3G cohorts using a categorical histological scoring system            | 20    |
| <b>Supplemental Table 1.</b> Definitions of histological features standardised and scored in the study.                                      | 21    |
| <b>Supplemental Table 2.</b> Reproducibility of histology scores.                                                                            | 22    |
| <b>Supplemental Table 3.</b> Definitions of Activity and Chronicity scores.                                                                  | 23    |
| <b>Supplemental Table 4.</b> Joint model showing longitudinal change in proteinuria and the hazard of reaching an outcome event.             | 24    |
| <b>Supplemental Table 5.</b> Correlations between eGFR and Proteinuria and histology features in the whole cohort.                           | 25    |
| <b>Supplemental Table 6.</b> Correlations between eGFR and Proteinuria and histology features in C3G cohort only.                            | 26    |
| <b>Supplemental Table 7.</b> Regression of histological features with eGFR and proteinuria at the time of biopsy.                            | 27    |
| <b>Supplemental Table 8.</b> Indications for repeat (B2) biopsy in 39 patients.                                                              | 28    |
| <b>Supplemental Table 9.</b> Indications for native kidney baseline (B1) and repeat (B2) biopsy where diagnosis changed from Ig-MPGN to C3G. | 29    |
| <b>Supplemental Table 10.</b> Regression of histological features with eGFR and proteinuria at the time of a first repeat native biopsy.     | 30    |

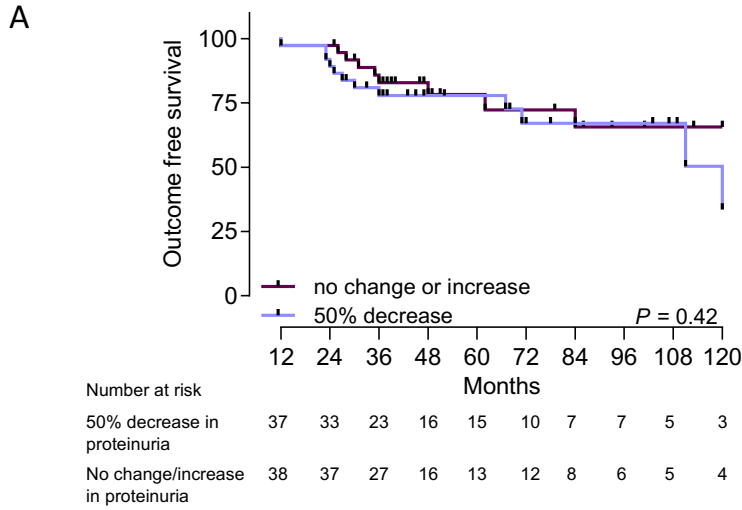

**B ALL COHORT**

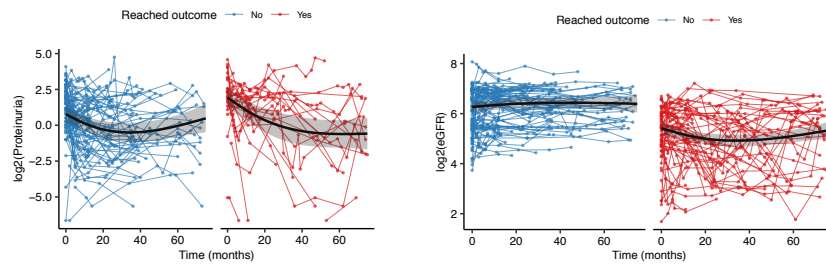

**C3G COHORT**

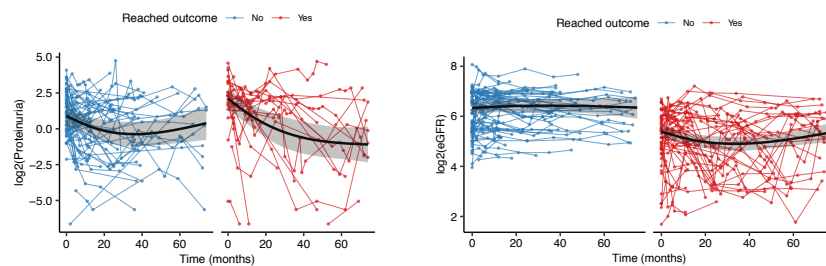

**Supplemental Figure 1. Proteinuria and outcome free survival.** (A) Relationship between outcome free survival and changes in proteinuria over the 12 months following baseline biopsy. Proteinuria changes were analysed in 75 patients over 12 months, all of whom had at least 2 years of follow up to reliably determine stable vs progressive disease. The patients were split into those who had a 50% reduction in proteinuria over 12 months ( $n=39$ ) following diagnosis and those who did not ( $n=42$ ). Progression to an outcome event was compared in these groups by survival analysis (Log-rank test). No significant differences were seen when patients who had  $<1\text{g}/24\text{hr}$  of proteinuria at the time of diagnosis were removed from the analysis. (B) Subject-specific  $\log_2(\text{Proteinuria})$  and  $\log_2(\text{eGFR})$  over time in the whole cohort (upper panel) and C3G cohort (lower panel) grouped into those that did (red lines) and did not (blue lines) reach the composite outcome at 75 months. Using JMBayes2 package in R Quadratic splines were used to estimate the longitudinal profiles (black lines) and the 95% confidence intervals (grey shading) were estimated using joint linear mixed-effect and Cox proportional hazards models (variables included were sex, eGFR at diagnosis, diagnosis [C3GN, DDD, Ig-MPGN], age, immunosuppression use [yes/no], cellular/fibrocellular crescents and IFTA scores). Numbers analysed: Whole cohort proteinuria ( $n=77$  individuals,  $n=334$  time points) and eGFR ( $n=109$  individuals,  $n=489$  time points); C3G cohort proteinuria ( $n=60$  individuals,  $n=252$  time points) and eGFR ( $n=90$  individuals,  $n=391$  time points).

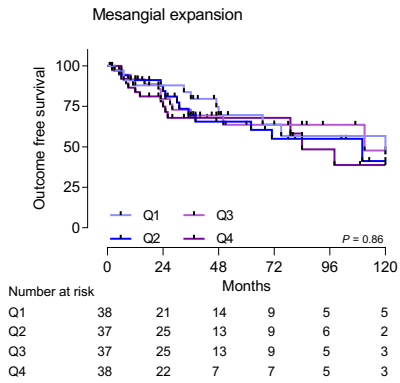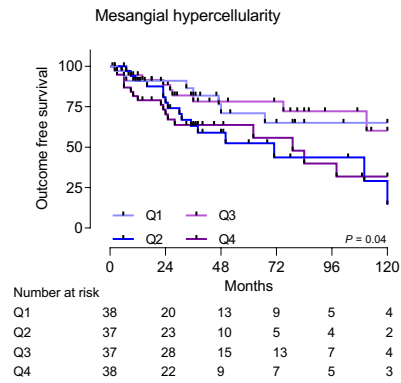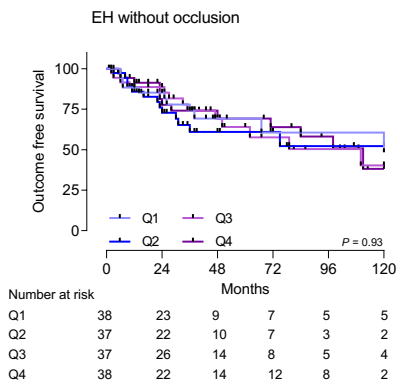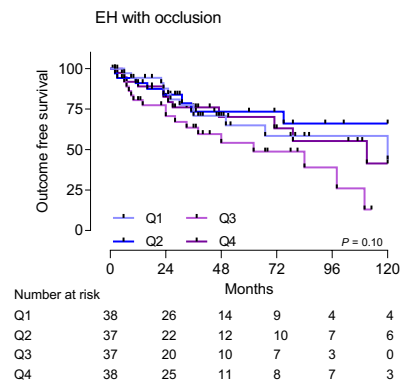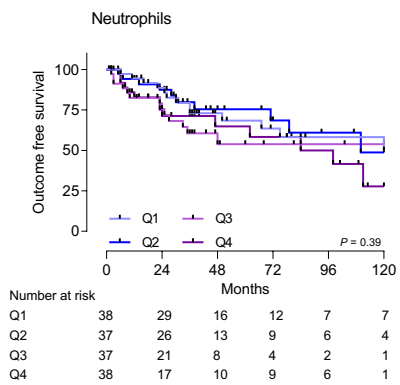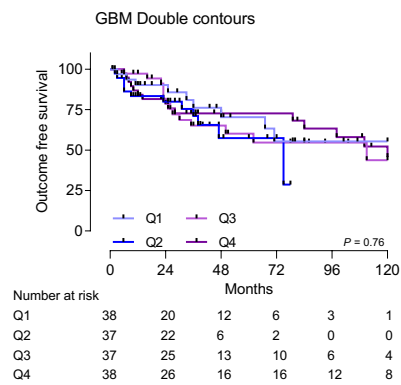

**Supplemental Figure 2. Outcome free survival in the whole cohort by individual histological score quartiles.** Pathology scores were divided into quartiles (Q1, 2, 3 and 4). No differences were detected for mesangial expansion, mesangial hypercellularity, EH with or without occlusion, neutrophils and GBM double contours. *P* values derived from Log-rank test. GBM – glomerular basement membrane; EH – endocapillary hypercellularity.

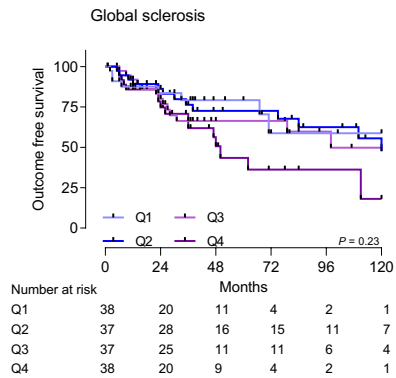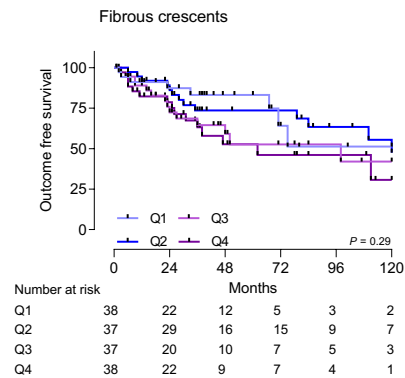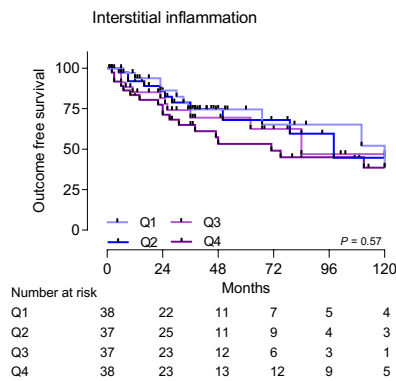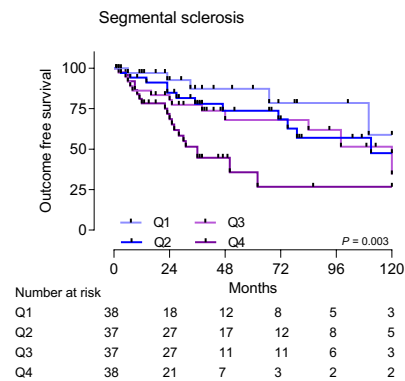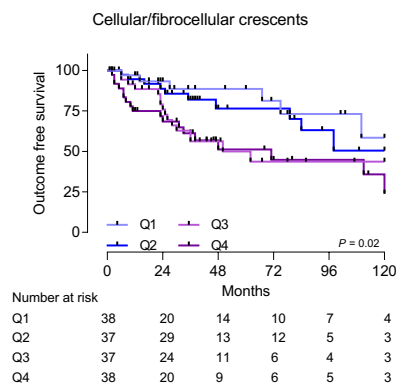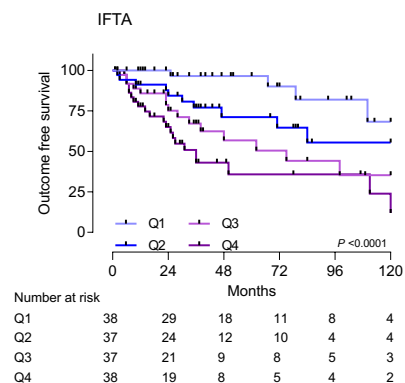

**Supplemental Figure 2 (continued). Outcome free survival in the whole cohort by individual histological score quartiles.** Pathology scores were divided into quartiles (Q1, 2, 3 and 4). No differences were detected for global sclerosis, fibrous crescents and interstitial inflammation. Significant differences were detected for segmental sclerosis, cellular/fibrocellular crescents and IFTA. P values derived from Log-rank test. IFTA – interstitial fibrosis and tubular atrophy.

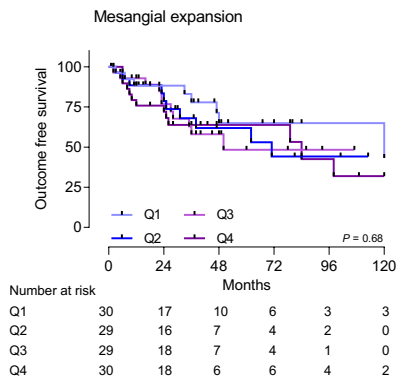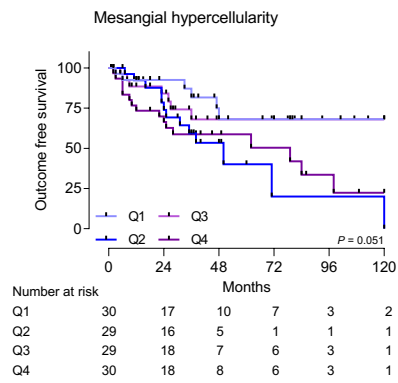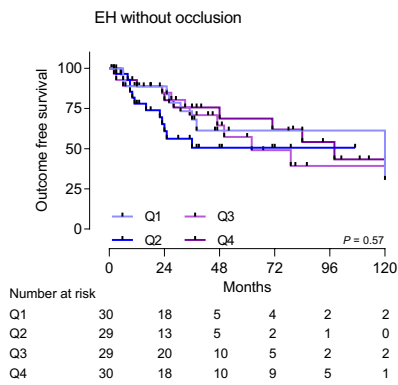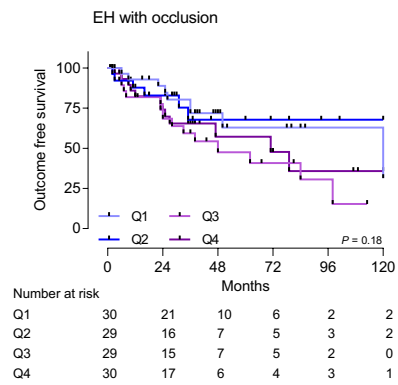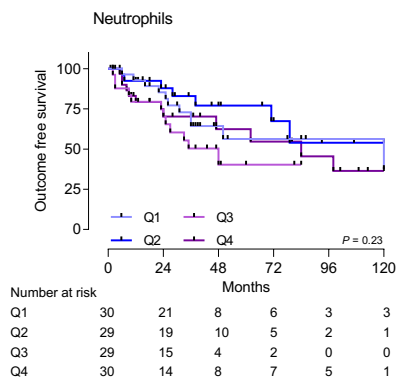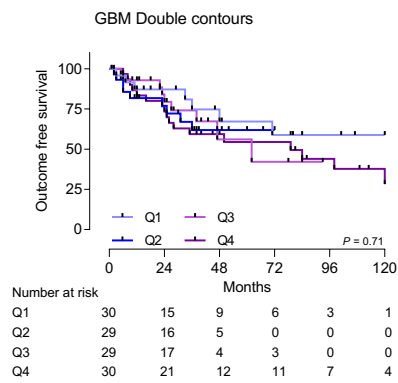

**Supplemental Figure 3. Outcome free survival in the C3 glomerulopathy cohort by individual histological score quartiles.** Pathology scores were divided into quartiles (Q1, 2, 3 and 4). No differences were detected for mesangial expansion, mesangial hypercellularity, EH with or without occlusion, neutrophils and GBM double contours. *P* values derived from Log-rank test. GBM – glomerular basement membrane; EH – endocapillary hypercellularity.

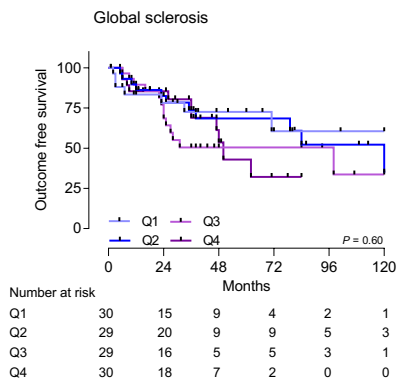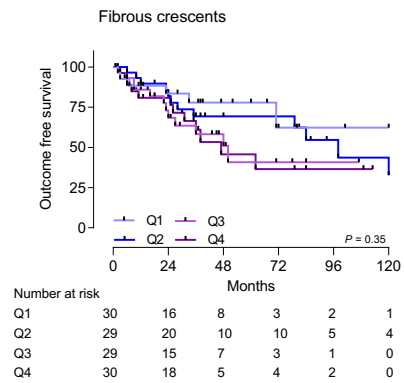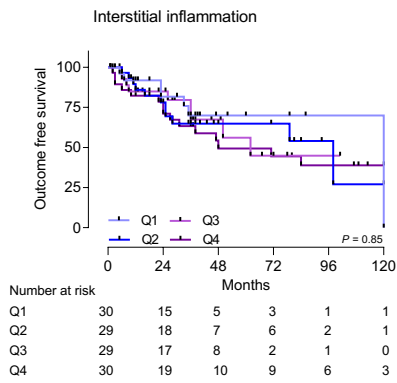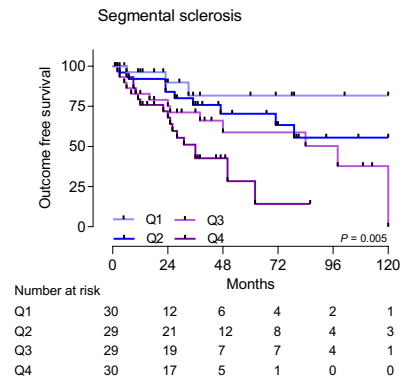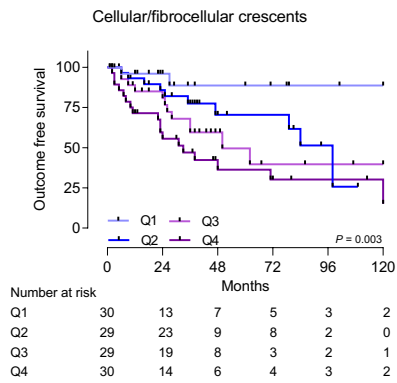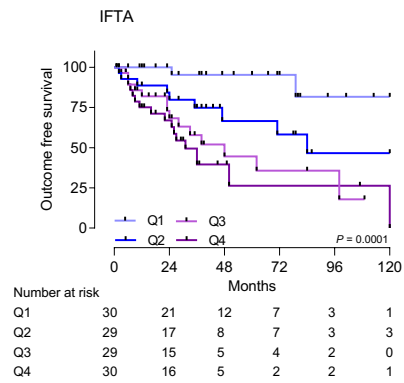

**Supplemental Figure 3 (continued). Outcome free survival in the C3 glomerulopathy cohort by individual histological score quartiles.** Pathology scores were divided into quartiles (Q1, 2, 3 and 4). No differences were detected for global sclerosis, fibrous crescents and interstitial inflammation. Significant differences were detected for segmental sclerosis, cellular/fibrocellular crescents and IFTA. *P* values derived from Log-rank test. IFTA – interstitial fibrosis and tubular atrophy.

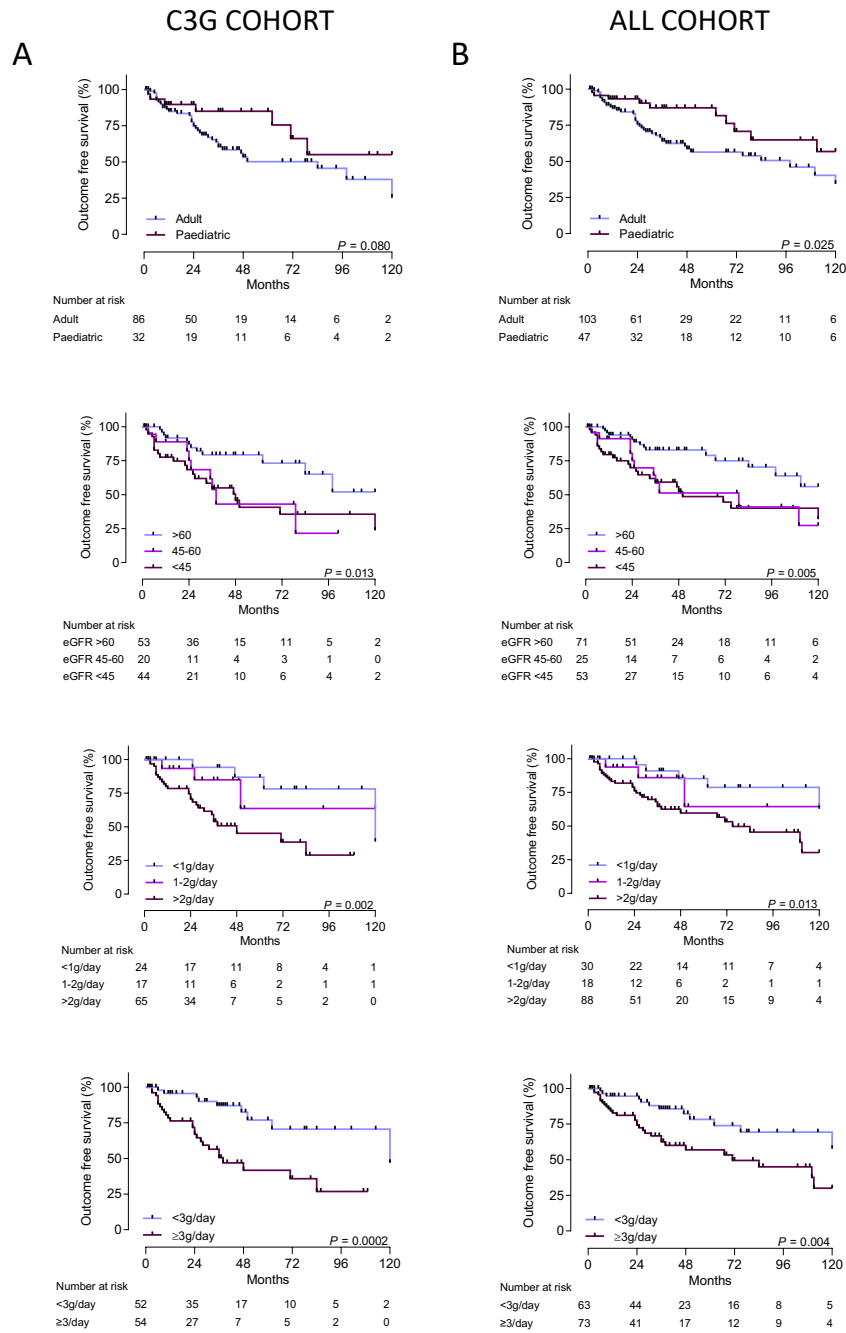

**Supplemental Figure 4. Progression to a combined outcome event.** This was assessed in (A) the C3G cohort, (B) the whole cohort, (C) the C3GN cohort, (D) the DDD cohort and (E) the Ig-MPGN cohort and stratified by age (adult vs. paediatric); eGFR and proteinuria. *P* values derived from Log-rank test. Proteinuria analysis n=136. eGFR analysis n=149, n=6 excluded due to ESKD at baseline. eGFR - estimated glomerular filtration rate; C3G - C3 glomerulopathy (C3 glomerulonephritis and Dense Deposit Disease); Ig-MPGN, idiopathic immunoglobulin-associated membranoproliferative glomerulonephritis.



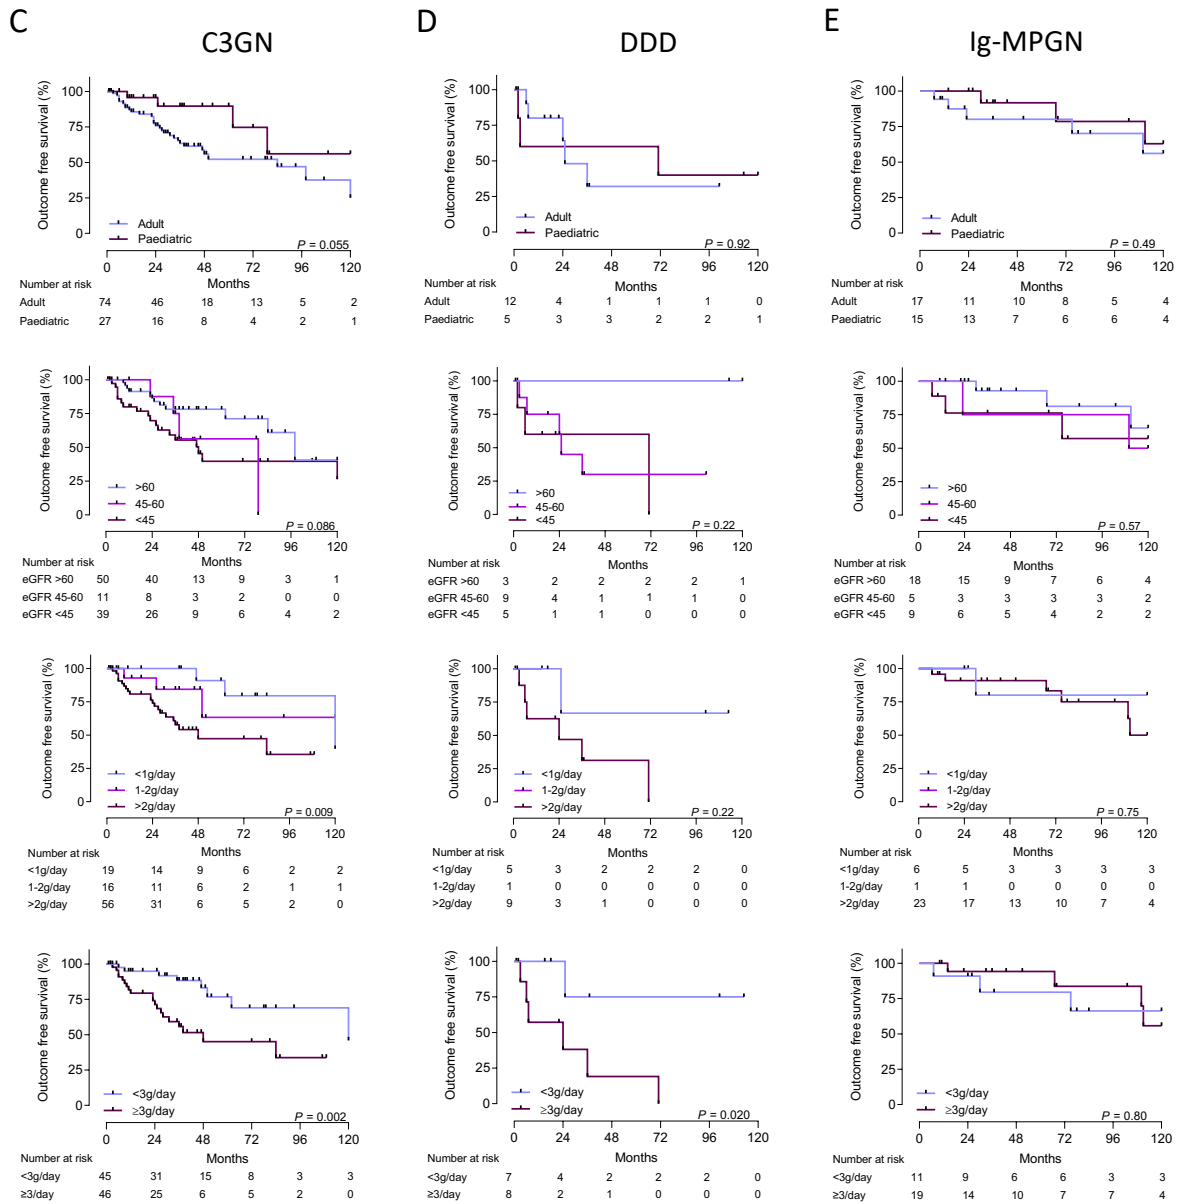

**Supplemental Figure 4 (continued). Progression to a combined outcome event.** This was assessed in (A) the C3G cohort, (B) the whole cohort, (C) the C3GN cohort, (D) the DDD cohort and (E) the Ig-MPGN cohort and stratified by age (adult vs. paediatric); eGFR and proteinuria.  $P$  values derived from Log-rank test. Proteinuria analysis  $n=136$ . eGFR analysis  $n=149$ ,  $n=6$  excluded due to ESKD at baseline. eGFR - estimated glomerular filtration rate; C3G - C3 glomerulopathy (C3 glomerulonephritis and Dense Deposit Disease); Ig-MPGN, idiopathic immunoglobulin-associated membranoproliferative glomerulonephritis.

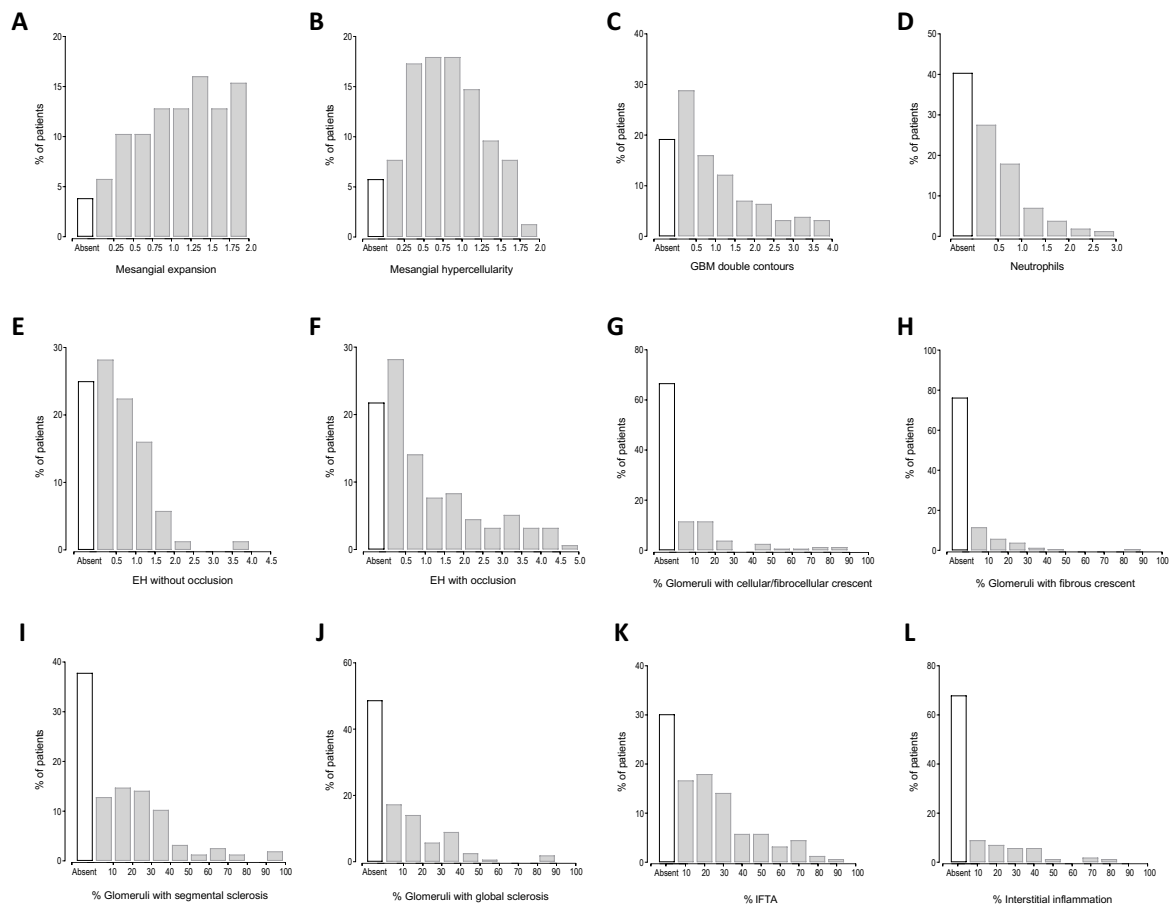

**Supplemental Figure 5. Histograms of the histological scores in 156 baseline kidney biopsies.** (A) Mesangial expansion; (B) Mesangial hypercellularity; (C) Glomerular basement membrane double contours; (D) Neutrophils; (E) Endocapillary hypercellularity without occlusion; (F) Endocapillary hypercellularity with occlusion; (G) Cellular/fibrocellular crescent; (H) Fibrous crescent; (I) Segmental sclerosis; (J) Global sclerosis; (K) Interstitial fibrosis and tubular atrophy and (L) Interstitial inflammation. GBM, glomerular basement membrane; EH, endocapillary hypercellularity; IFTA, Interstitial fibrosis and tubular atrophy.

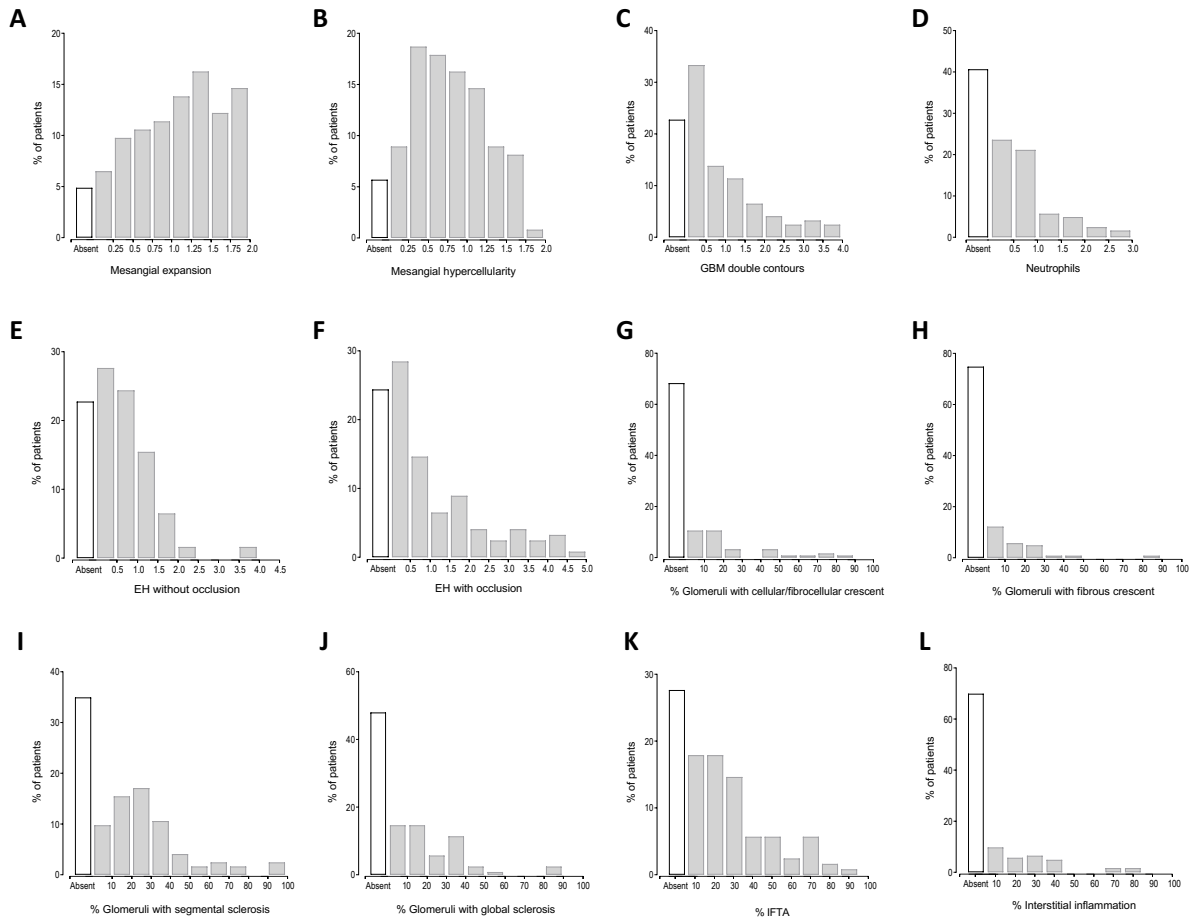

**Supplemental Figure 6. Histograms of the histological scores in 123 baseline kidney biopsies with C3G.** (A) Mesangial expansion; (B) Mesangial hypercellularity; (C) Glomerular basement membrane double contours; (D) Neutrophils; (E) Endocapillary hypercellularity without occlusion; (F) Endocapillary hypercellularity with occlusion; (G) Cellular/fibrocellular crescent; (H) Fibrous crescent; (I) Segmental sclerosis; (J) Global sclerosis; (K) Interstitial fibrosis and tubular atrophy and (L) Interstitial inflammation. GBM, glomerular basement membrane; EH, endocapillary hypercellularity; IFTA, Interstitial fibrosis and tubular atrophy.

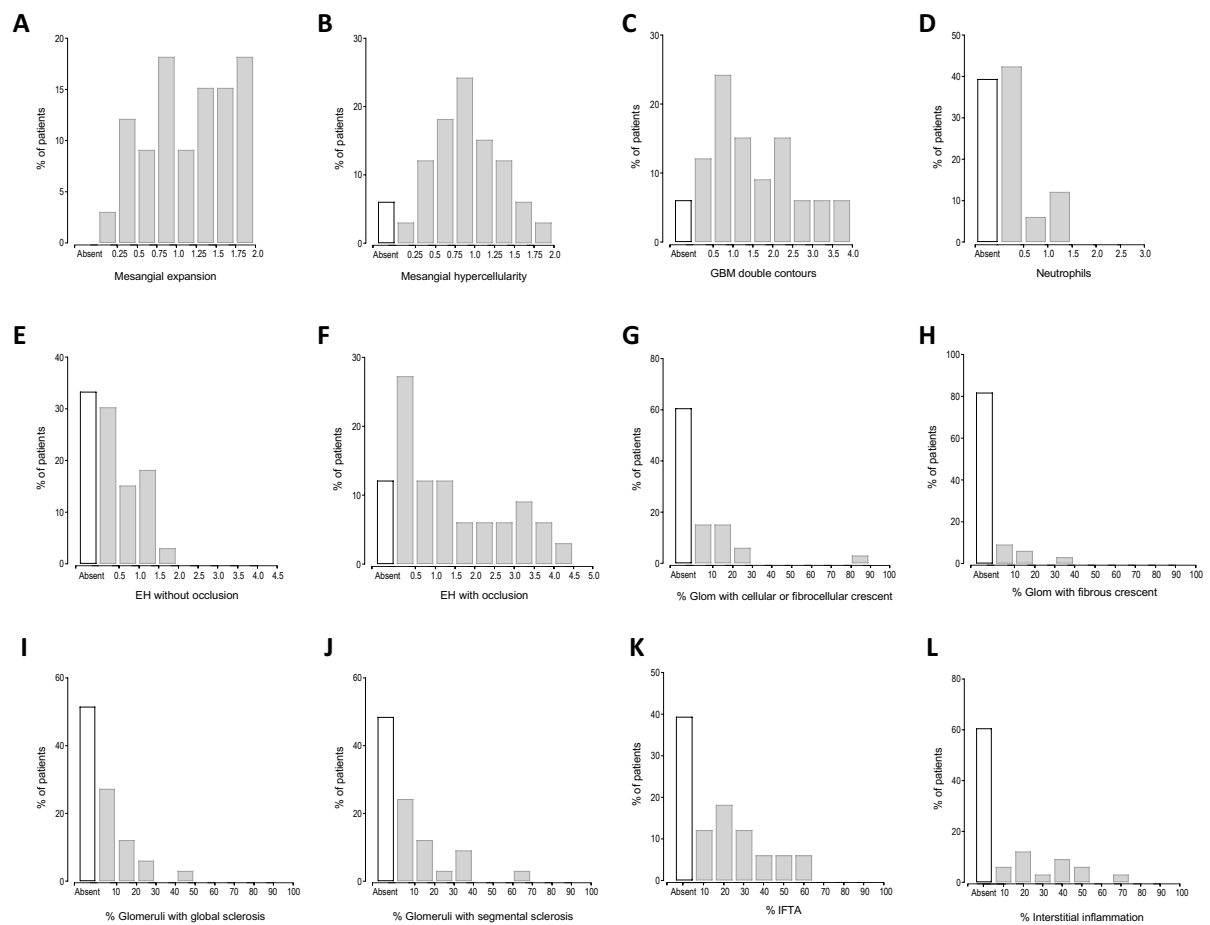

**Supplemental Figure 7. Histograms of the histological scores in 33 baseline kidney biopsies with Ig-MPGN.** (A) Mesangial expansion; (B) Mesangial hypercellularity; (C) Glomerular basement membrane double contours; (D) Neutrophils; (E) Endocapillary hypercellularity without occlusion; (F) Endocapillary hypercellularity with occlusion; (G) Cellular/fibrocellular crescent; (H) Fibrous crescent; (I) Segmental sclerosis; (J) Global sclerosis; (K) Interstitial fibrosis and tubular atrophy and (L) Interstitial inflammation. GBM, glomerular basement membrane; EH, endocapillary hypercellularity; IFTA, Interstitial fibrosis and tubular atrophy.

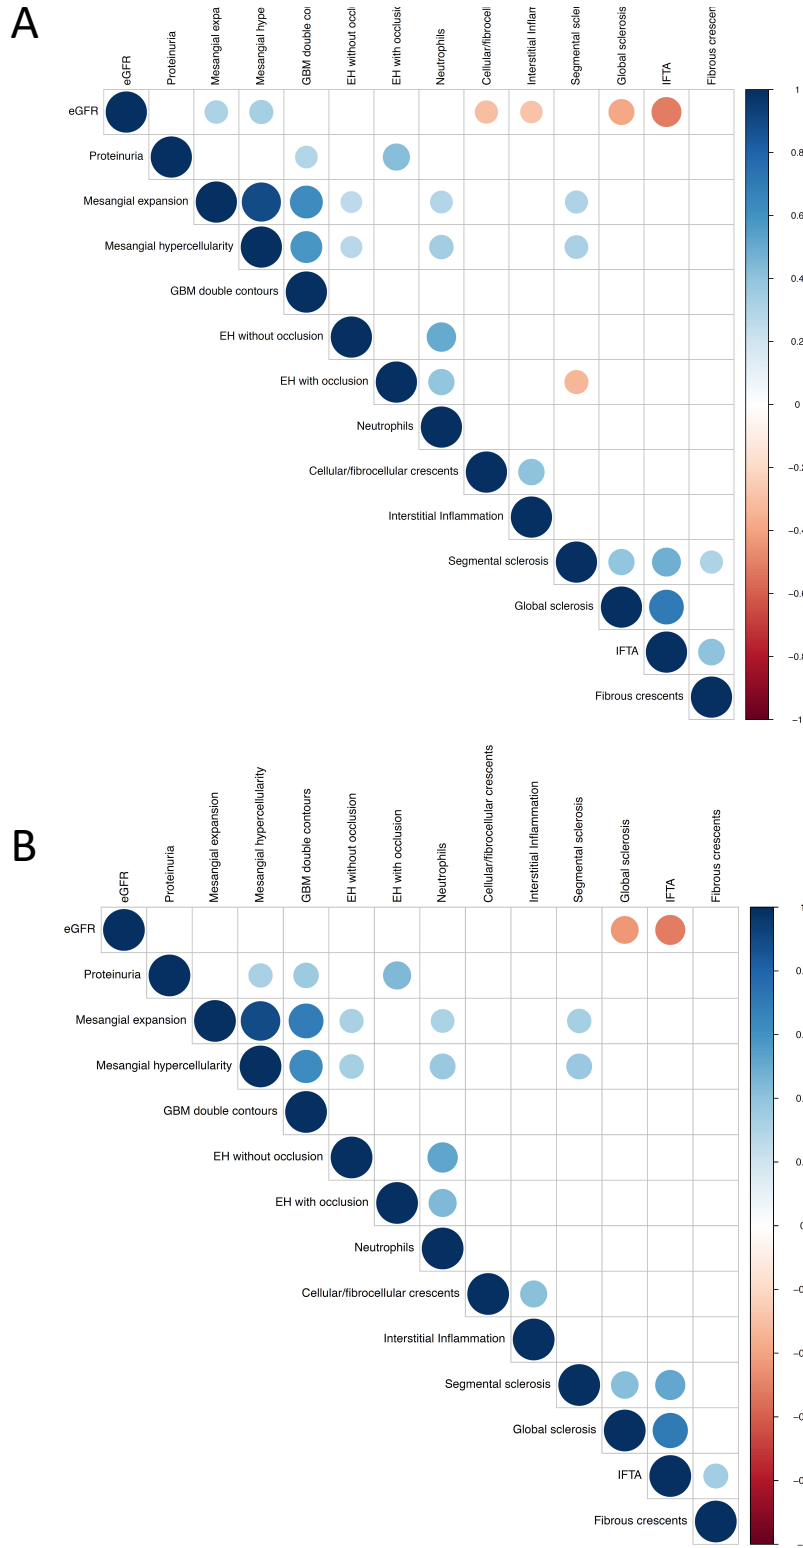

**Supplemental Figure 8. Correlation between histological variables, eGFR, proteinuria, activity and chronicity scores.** The correlograms for (A) the whole and (B) the C3G cohort represent Spearman's rho rank correlation coefficients for all possible pair-wise comparisons below the statistical threshold (Holm-Sidak adjusted  $P$  value; 0.00078 and 0.00072 respectively). Circle areas represent rho values with positive coefficients in blue and negative coefficients in red. EH - endocapillary hypercellularity; GBM - glomerular basement membrane; IFTA - interstitial fibrosis and tubular atrophy; eGFR - estimated glomerular filtration rate. Coefficients,  $P$  values and number of pairwise comparisons are listed in Supplemental Tables 5 and 6.

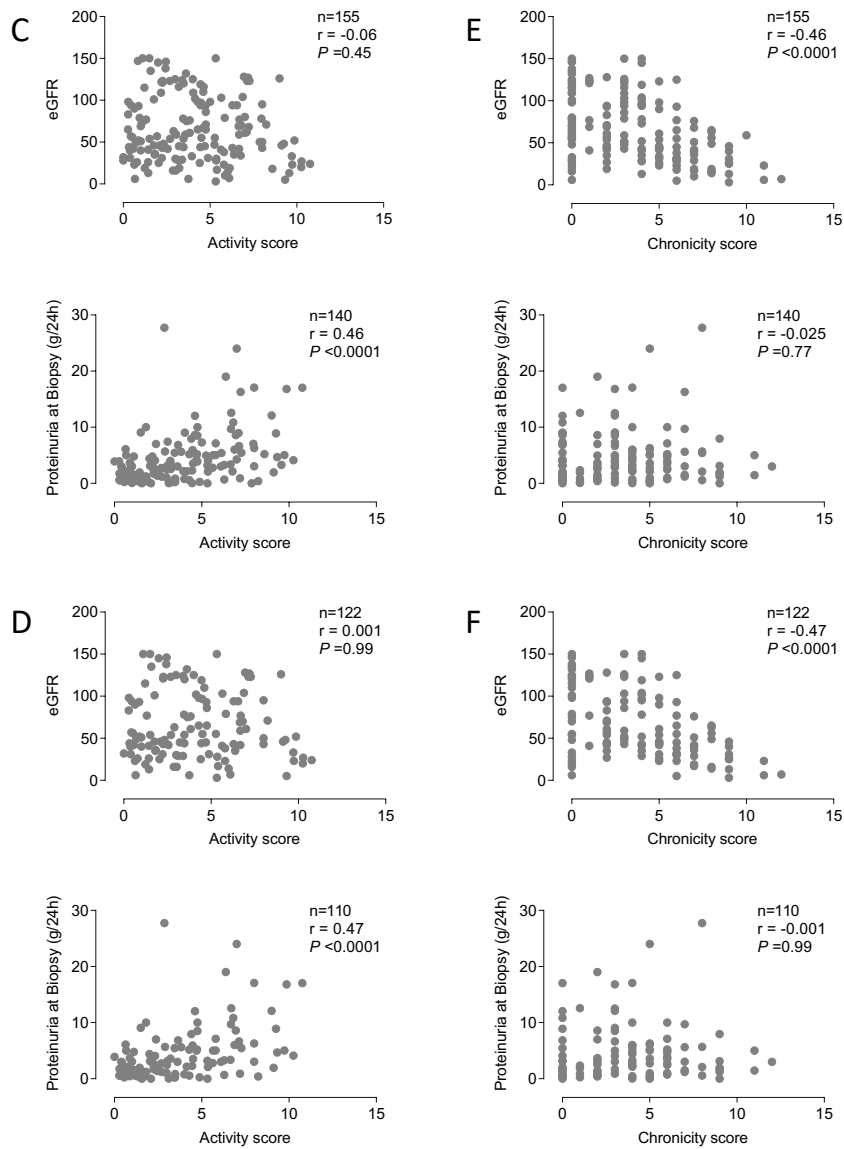

**Supplemental Figure 8 (continued). Correlation between histological variables, eGFR, proteinuria, activity and chronicity scores.** Correlations between baseline biopsy activity and chronicity scores and eGFR and proteinuria at the time of biopsy in (C and E) the whole cohort and (D and F) the C3G cohort. Data derived from the Spearman rank correlation;  $r$  represents Spearman's rho. C3G - C3 glomerulopathy; eGFR - estimated glomerular filtration rate in ml/min/1.73m<sup>2</sup>.

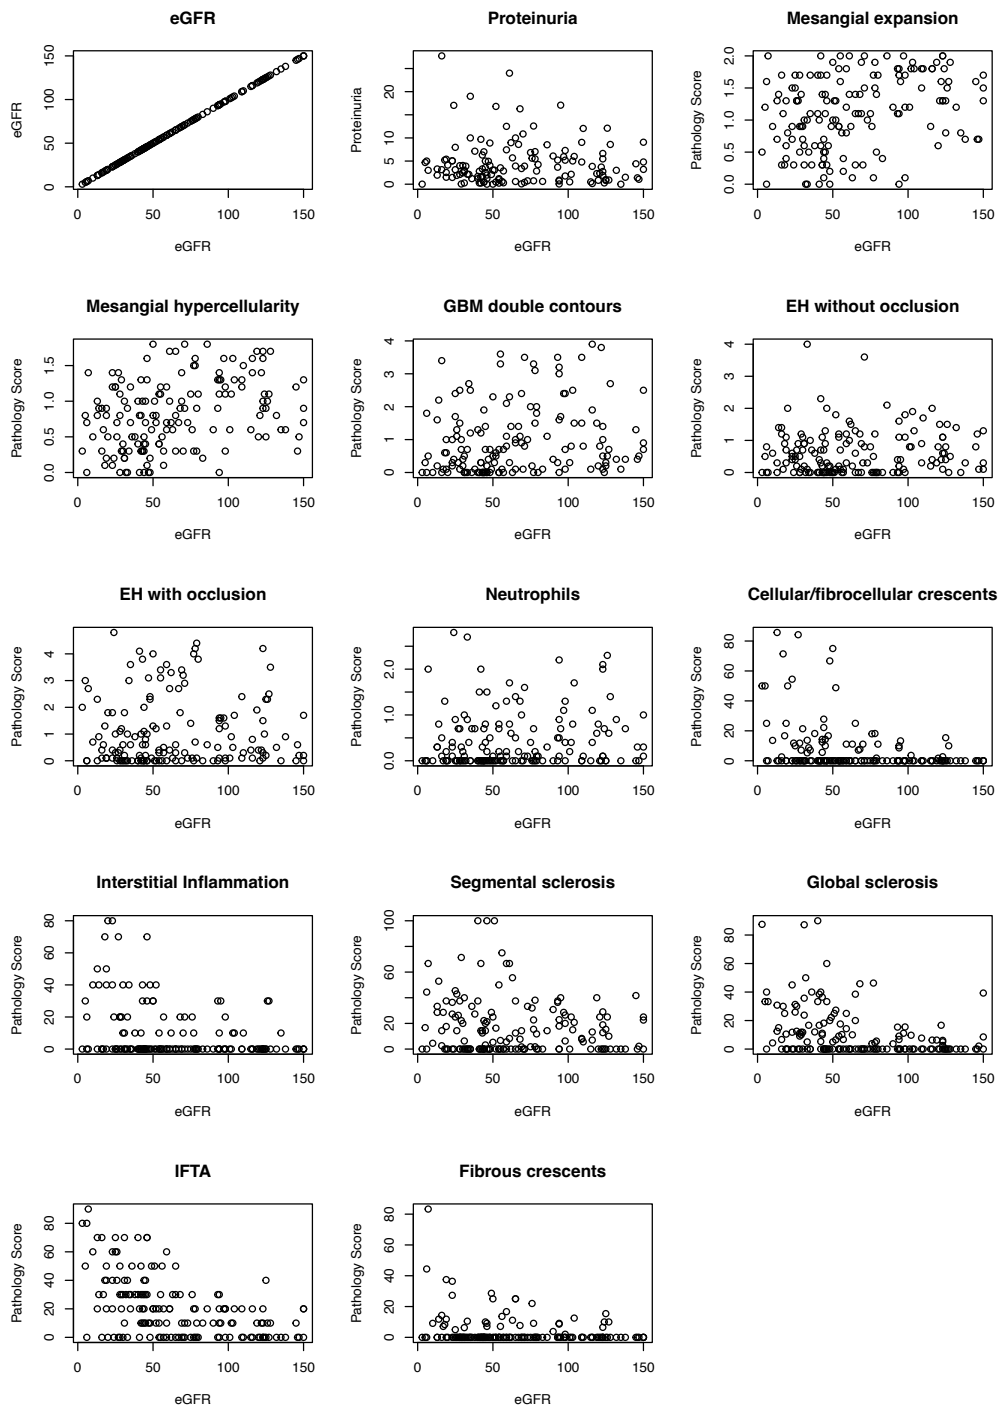

**Supplemental Figure 9. Scatterplots of eGFR vs Proteinuria and histological features in the whole cohort.** Interstitial fibrosis and tubular atrophy, fibrous crescents, interstitial inflammation, Cellular/fibrocellular crescents and mesangial hypercellularity were significantly associated with eGFR in a multivariate analysis (See Table 3). Due to strong correlation between mesangial hypercellularity and mesangial expansion, mesangial expansion was not included in the multivariate analysis. EH – endocapillary hypercellularity; IFTA – interstitial fibrosis and tubular atrophy; GBM – glomerular basement membrane; eGFR – estimated glomerular filtration rate.

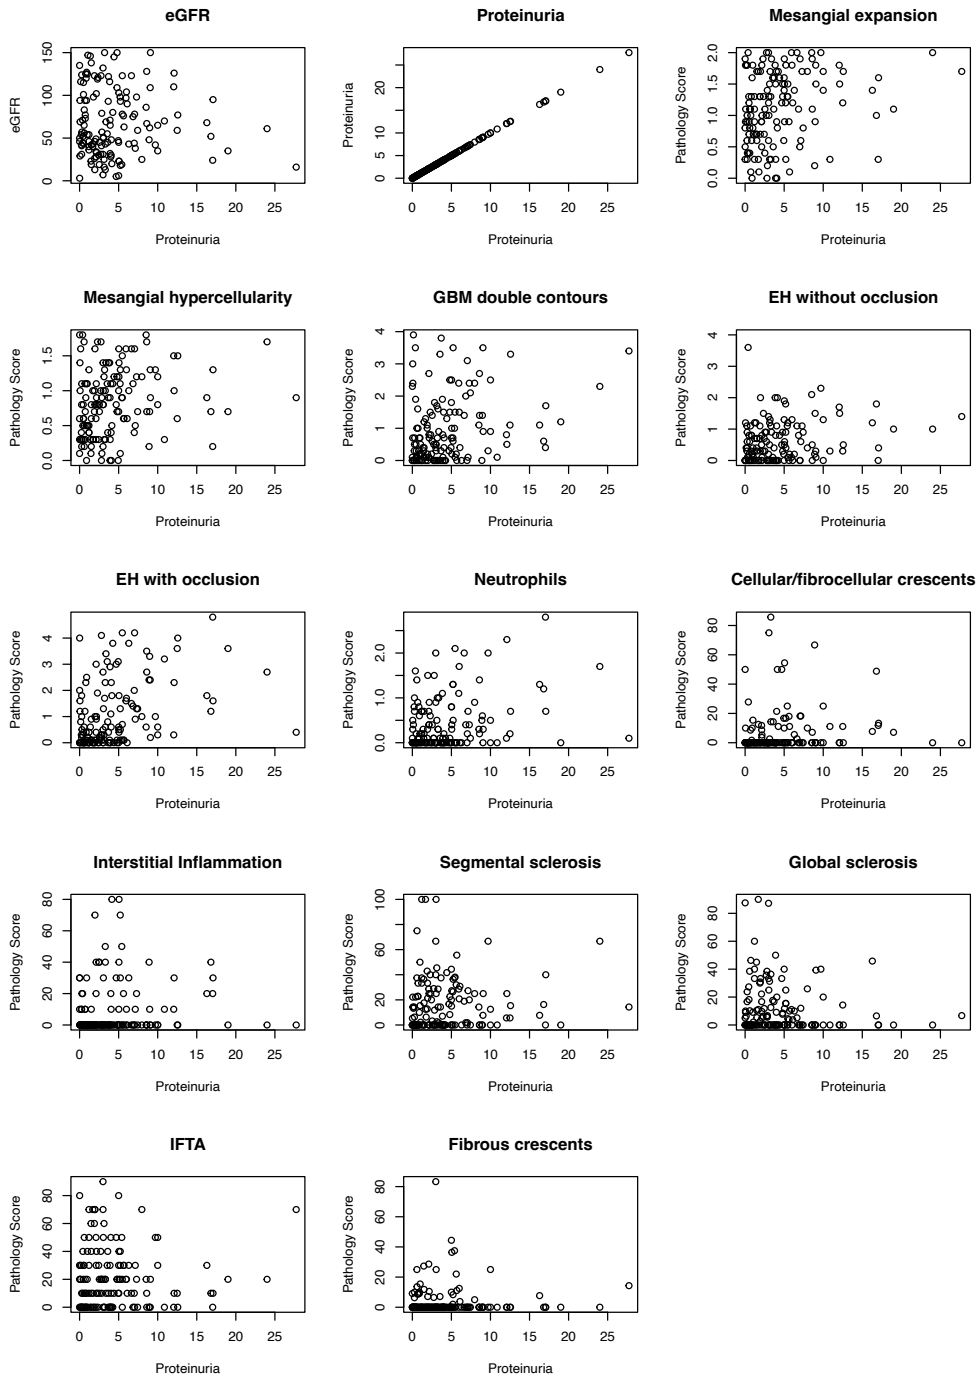

**Supplemental Figure 10. Scatterplots of Proteinuria vs eGFR and histological features in the whole cohort.** Endocapillary hypercellularity with occlusions, endocapillary hypercellularity without occlusions and GBM double contours were significantly associated with eGFR in a multivariate analysis (See Table 3). Due to strong correlation, mesangial hypercellularity and mesangial expansion, mesangial expansion was not included in the multivariate analysis. EH – endocapillary hypercellularity; IFTA – interstitial fibrosis and tubular atrophy; GBM – glomerular basement membrane; eGFR – estimated glomerular filtration rate.



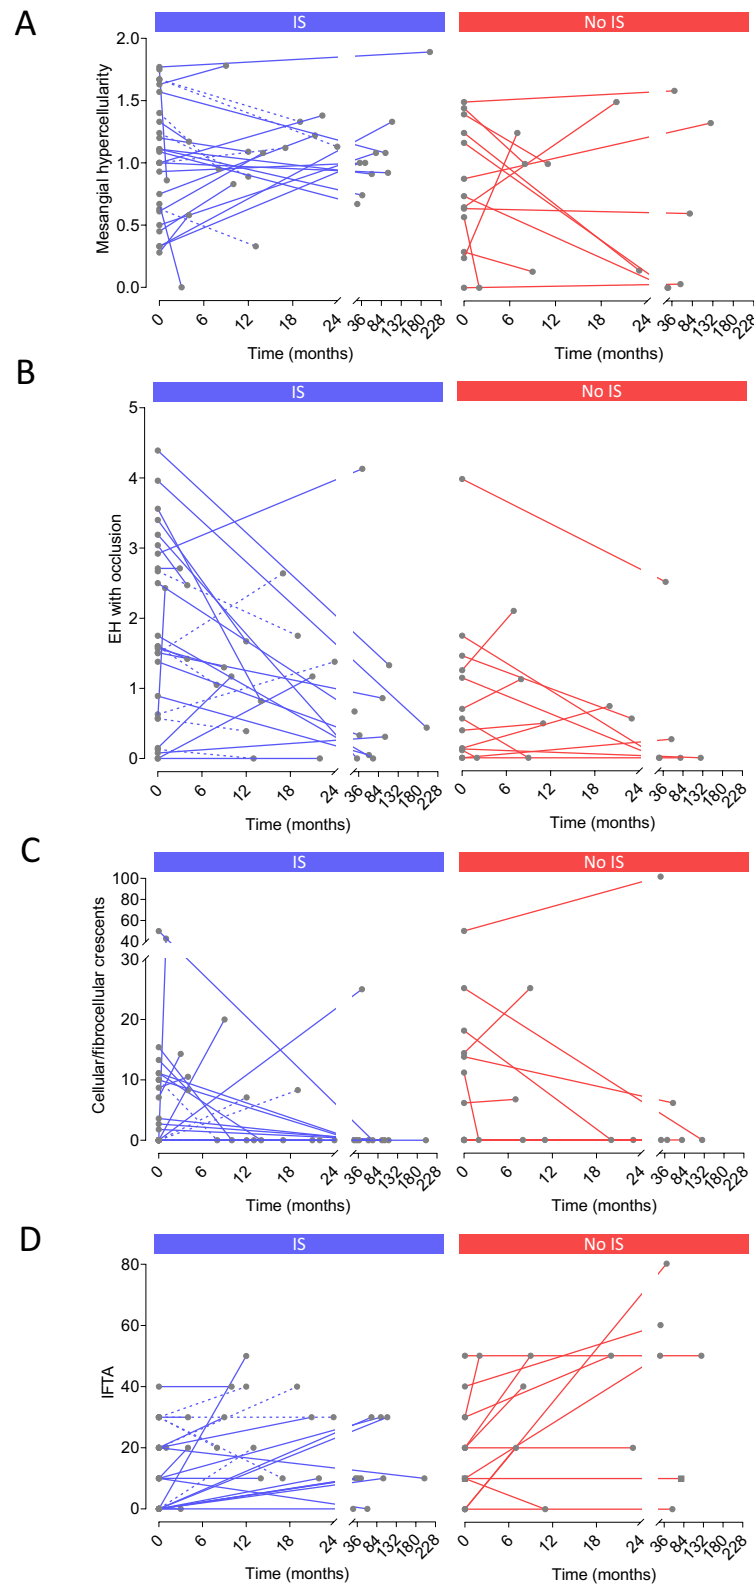

**Supplemental Figure 11. Biopsy features over time.** Histopathology features scored in both baseline and first repeat native biopsies were grouped into patients who had (blue, n=26) or had not (red, n=13) received any form of immunosuppressive therapy. (A) Mesangial hypercellularity; (B) endocapillary hypercellularity (EH) with occlusion; (C) cellular/fibrocellular crescents and (D) interstitial fibrosis and tubular atrophy (IFTA). Each graph indicates the time between baseline and second biopsies which varied between patients, dashed lines represent patients with stable disease. Data compared by Fisher's exact test.

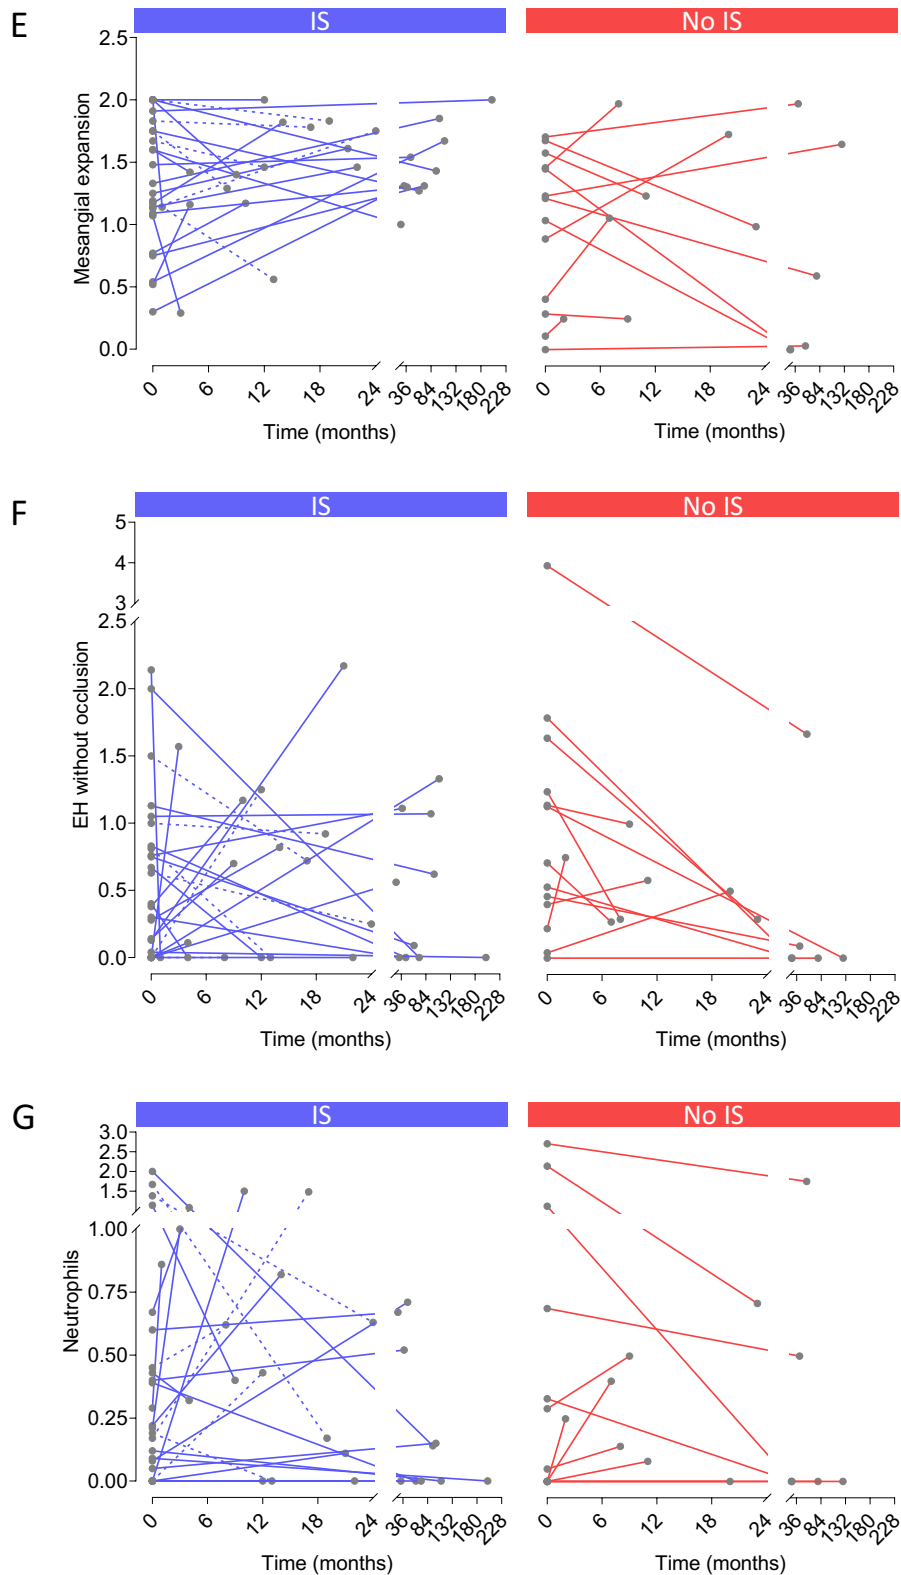

**Supplemental Figure 11 (continued). Biopsy features over time.** Histopathology features scored in both baseline and first repeat native biopsies were grouped into patients who had (blue, n=26) or had not (red, n=13) received any form of immunosuppressive therapy. (E) Mesangial expansion; (F) endocapillary hypercellularity (EH) without occlusion; (G) neutrophils. Each graph indicates the time between baseline and second biopsies which varied between patients, dashed lines represent patients with stable disease. Data compared by Fisher's exact test.

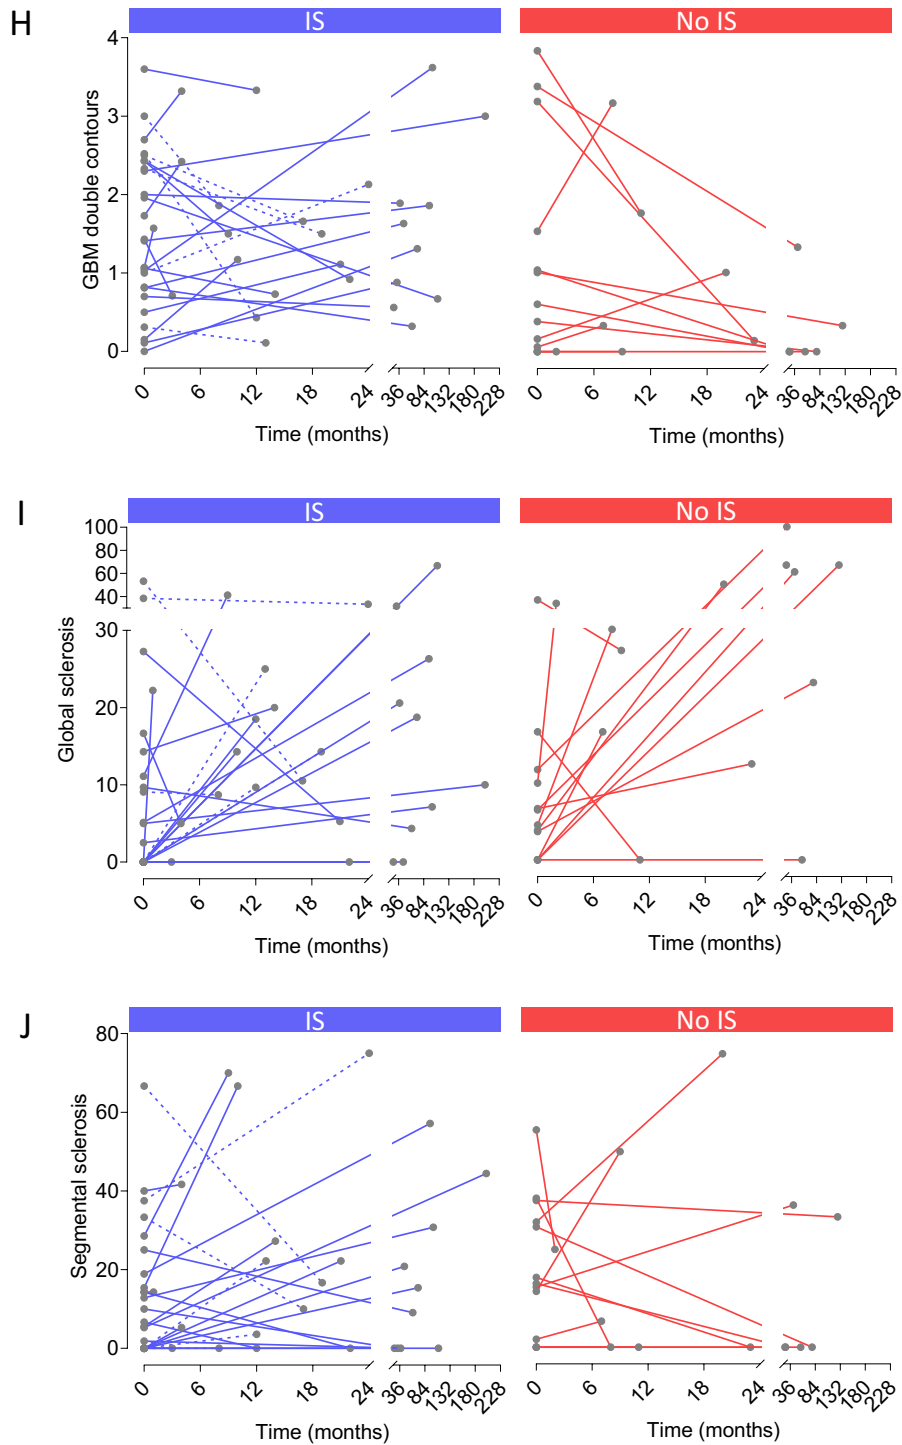

**Supplemental Figure 11 (continued). Biopsy features over time.** Histopathology features scored in both baseline and first repeat native biopsies were grouped into patients who had (blue, n=26) or had not (red, n=13) received any form of immunosuppressive therapy. (H) GBM double contours; (I) global sclerosis; (J) segmental sclerosis. Each graph indicates the time between baseline and second biopsies which varied between patients, dashed lines represent patients with stable disease. Data compared by Fisher's exact test.

## C3G COHORT

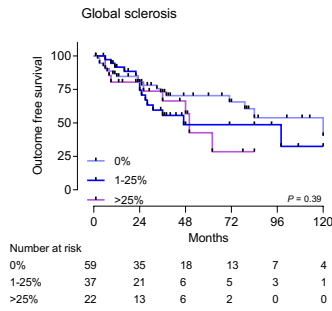

## ALL COHORT

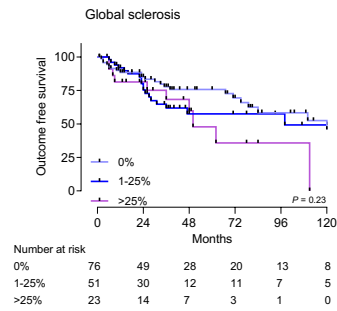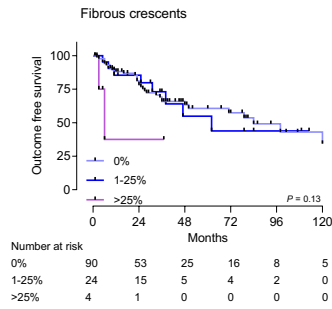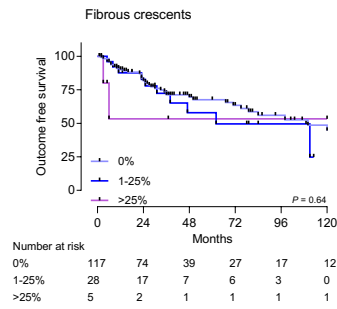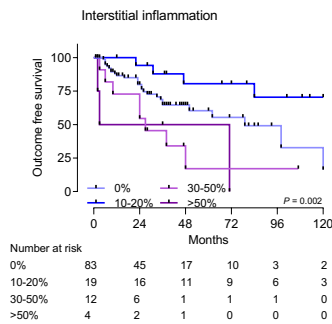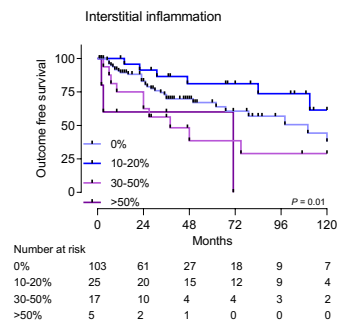

**Supplemental Figure 12. Outcome free survival in the whole and C3G cohort using a categorical histological scoring system.** Based on score distribution we grouped scores using a scale of either 0, 1-25 >25% (cellular/fibrocellular crescents; segmental sclerosis; global sclerosis; fibrous crescents) or 0, 10-20, 30-50, >50% (IFTA, interstitial inflammation). Data for cellular/fibrocellular crescents; segmental sclerosis; and IFTA are shown in Figure 4, main manuscript. *P* values derived from Log-rank test. IFTA – interstitial fibrosis and tubular atrophy; C3G – C3 glomerulopathy.

| <b>Glomerular Definition</b> (A glomerulus is large enough to score if it contains at least 3 mesangial areas)                                                                                                                                                                                                                                                                                                                                                               | <b>Score</b>                         |
|------------------------------------------------------------------------------------------------------------------------------------------------------------------------------------------------------------------------------------------------------------------------------------------------------------------------------------------------------------------------------------------------------------------------------------------------------------------------------|--------------------------------------|
| <i>Unscorable:</i> A glomerulus that is too small to score (Yes=1/No=0).                                                                                                                                                                                                                                                                                                                                                                                                     | 0/1                                  |
| <i>Normal:</i> A glomerulus that does not have any of the specific abnormal features listed below (Yes=1/No=0).                                                                                                                                                                                                                                                                                                                                                              | 0/1                                  |
| <i>Minimally abnormal glomerulus:</i> A glomerulus that is nearly normal without any of the specific features scored below. The abnormality is noted.                                                                                                                                                                                                                                                                                                                        |                                      |
| <i>Ischemic changes:</i> Global tuft collapse and capillary wall wrinkling with or without thickening of Bowman's capsule. May also show fibrosis inside Bowman's space. May be present with other lesions detailed below (Present=1/Absent=0).                                                                                                                                                                                                                              | 0/1                                  |
| <i>Mesangial expansion:</i> An increase in the extracellular material in the mesangium. Scored as follows:                                                                                                                                                                                                                                                                                                                                                                   |                                      |
| 0 - absent                                                                                                                                                                                                                                                                                                                                                                                                                                                                   | 0/1/2                                |
| 1- increase in the extracellular material in the mesangium such that the width of the mesangium exceeds two mesangial cell nuclei in at least two glomerular lobules.                                                                                                                                                                                                                                                                                                        |                                      |
| 2- increase in the extracellular material in the mesangium such that the width of the mesangium exceeds four mesangial cell nuclei in at least two glomerular lobules.                                                                                                                                                                                                                                                                                                       |                                      |
| <i>Mesangial hypercellularity:</i> Four or more nuclei in a mesangial area away from the hilum and not adjacent to an area of sclerosis or endocapillary hypercellularity. N.B. Feature not scored in sclerotic areas or areas with endocapillary hypercellularity (not assessable/absent/4-7/>7).                                                                                                                                                                           | -1/0/1/2                             |
| <i>Endocapillary hypercellularity</i> (2 categories):                                                                                                                                                                                                                                                                                                                                                                                                                        |                                      |
| 1. <u>Cells in the lumens without occlusion</u> (0, 1 cell per glomerulus, >1 cell in 1-10% lumens, 11-25%, 26-50%, 50-75%, >75%).                                                                                                                                                                                                                                                                                                                                           | 0/1/2/3/4/5/6                        |
| 2. <u>Increased cells in capillary lumens with occlusion</u> (0, 1-10%, 11-25%, 26-50%, 50-75%, >75% of loops involved).                                                                                                                                                                                                                                                                                                                                                     | 0/1/2/3/4/5                          |
| <i>Neutrophils:</i> In any location within the glomerulus (0, 1, 2-3, 4-10, >10).                                                                                                                                                                                                                                                                                                                                                                                            | 0/1/2/3/4                            |
| <i>Necrosis:</i> Disruption of the glomerular basement membrane, fibrin and karyorrhexis. At least two of these three lesions need to be present to meet the criteria for necrosis (Present=1/Absent=0).                                                                                                                                                                                                                                                                     | 0/1                                  |
| <i>Glomerular basement membrane (GBM) duplication:</i> A double contour of the GBM with or without endocapillary hypercellularity (0, 1-25%, 26-50%, 51-75%, >75% of capillary loops involved).                                                                                                                                                                                                                                                                              | 0/1/2/3/4                            |
| <i>Segmental sclerosis:</i> Obliteration of the capillary lumens by increased extracellular matrix with or without hyalinosis, with or without foam cells, involving part of but not the whole tuft. Percentage of glomeruli with feature was determined.                                                                                                                                                                                                                    | Percentage                           |
| <b>Extracapillary lesions</b> (sub-classified as follows):                                                                                                                                                                                                                                                                                                                                                                                                                   |                                      |
| <i>Cellular crescent:</i> Extracapillary cell proliferation of more than two cell layers, more than 75% cells and fibrin and less than 25% fibrous matrix. This is further classified by the percentage of the glomerular circumference involved. Percentage of glomeruli with feature was determined.                                                                                                                                                                       | Percentage                           |
| <i>Fibrocellular crescent:</i> Part of the circumference of Bowman's capsule covered by a combination of cells and extracellular matrix, with 25-75% cells and fibrin and the remainder fibrous matrix. This lesion is often associated with disruption of Bowman's capsule. Ischemic, obsolescent glomeruli should be excluded. This is further classified by the percentage of the glomerular circumference involved. Percentage of glomeruli with feature was determined. | Percentage                           |
| <i>Fibrous crescent:</i> More than 10% of the circumference of Bowman's capsule covered by a lesion composed of <u>more than 75% fibrous matrix and less than 25% cells and fibrin</u> . This is further classified by the percentage of the glomerular circumference involved. Percentage of glomeruli with feature was determined.                                                                                                                                         | Percentage                           |
| A glomerulus may be involved with more than one type of crescent.                                                                                                                                                                                                                                                                                                                                                                                                            |                                      |
| <i>Visceral epithelial cell hypertrophy:</i> Prominent enlargement of the cytoplasm in a cluster of at least 3 cells, with or without cytoplasmic vacuoles or protein droplets, and/or nuclear enlargement with or without nucleoli (Present=1/Absent=0).                                                                                                                                                                                                                    | 0/1                                  |
| <i>Tip Lesion:</i> A segmental lesion involving the tip domain (outer 25% of tuft next to origin of proximal tubule). The tubular pole must be identified in the defining lesion. The lesion must have either an adhesion or confluence of podocytes with parietal or tubular cells at the tubular lumen or neck. Tip lesion may be cellular or sclerosing (Present=1/Absent=0).                                                                                             | 0/1                                  |
| <i>Global sclerosis:</i> The entire glomerular tuft involved with sclerosis (Present=1/Absent=0).                                                                                                                                                                                                                                                                                                                                                                            | 0/1                                  |
| <i>An adhesion:</i> An extracellular matrix attachment in a glomerulus without segmental sclerosis, or a fibrous or fibrocellular crescent (Present=1/Absent=0)                                                                                                                                                                                                                                                                                                              | 0/1                                  |
| <i>Thrombosis:</i> A mass of fibrin and platelets within capillary lumens (0, 1-25%, 26-50%, 51-75%, >75% of the glomerulus involved)                                                                                                                                                                                                                                                                                                                                        | 0/1/2/3/4                            |
| <i>Mesangiolysis:</i> Dissolution or attenuation of the mesangial matrix and degeneration of mesangial cells (0, 1-25%, 26-50%, 51-75%, >75% of the glomerulus involved).                                                                                                                                                                                                                                                                                                    | 0/1/2/3/4                            |
| <b>Tubulointerstitial definitions</b>                                                                                                                                                                                                                                                                                                                                                                                                                                        |                                      |
| <i>Tubular atrophy:</i> Thick irregular tubular basement membranes with decreased diameter of tubules, or the appearance of thyroidisation. It is scored according to the percent of cortical area involved rounded to the closest 10% (ie <5% = 0%).                                                                                                                                                                                                                        | 0/10/20/30/40/50<br>/60/70/80/90/100 |
| <i>Interstitial fibrosis:</i> Increased extracellular matrix separating tubules in the cortical area, excluding the subcapsular area. It is scored as percentage involvement rounded to the closest 10% (ie <5% = 0%)                                                                                                                                                                                                                                                        | 0/10/20/30/40/50<br>/60/70/80/90/100 |
| <i>Interstitial inflammation:</i> Inflammatory cells within the cortical interstitium. It is scored as percentage involvement in non-scarred areas rounded to the closest 10% (ie <5% = 0%).                                                                                                                                                                                                                                                                                 | 0/10/20/30/40/50<br>/60/70/80/90/100 |
| <i>Note if substantial inflammation in scarred areas</i> (Present=1/Absent=0).                                                                                                                                                                                                                                                                                                                                                                                               | 0/1                                  |
| <i>Note if tubulitis present</i> (Present=1/Absent=0).                                                                                                                                                                                                                                                                                                                                                                                                                       | 0/1                                  |
| Additional tubular lesions are noted as follows:                                                                                                                                                                                                                                                                                                                                                                                                                             |                                      |
| <i>Red blood cells:</i> The presence of numerous red blood cells, defined as tubules completely filled with red blood cells with or without casts, is noted as a lesion when it involves ≥20% of tubules. Score cortex and medulla separately (Present=1/Absent=0).                                                                                                                                                                                                          | 0/1                                  |
| <i>Acute tubular injury</i> of the proximal tubular epithelium is defined by simplification of the epithelium without tubular basement membrane thickening or widespread sloughing of cells and/or cell cytoplasm into tubular lumens. Scored as percentage of non-atrophic tubules involved (0, 5-10%, 11-25%, 26-50%, >50%)                                                                                                                                                | 0/1/2/3/4                            |
| <i>Foam cells:</i> Presence of foam cells in the biopsy is scored (absent, scanty, many).                                                                                                                                                                                                                                                                                                                                                                                    | 0/1/2                                |
| <b>Vascular definitions</b>                                                                                                                                                                                                                                                                                                                                                                                                                                                  |                                      |
| <i>Arterial lesions</i> are scored based on the most severe lesions. Interlobular and larger arteries are scored separately. Intimal thickening is scored by comparing the thickness of the intima to that of the media in the following categories: (0, <50%, >50%).                                                                                                                                                                                                        | 0/1/2                                |
| <i>Arteriolar lesions</i> are scored as follows:                                                                                                                                                                                                                                                                                                                                                                                                                             |                                      |
| <i>Non-hyaline arteriolar sclerosis</i> (Present=1/Absent=0)                                                                                                                                                                                                                                                                                                                                                                                                                 | 0/1                                  |
| <i>Arteriolar hyaline:</i> Marked hyaline in one or lesser hyaline in more than one. (Present=1/Absent=0)                                                                                                                                                                                                                                                                                                                                                                    | 0/1                                  |
| Of note: Other vascular lesions including thrombosis or TMA changes can be noted on the scoring form in the "comments/other" box.                                                                                                                                                                                                                                                                                                                                            |                                      |
| <b>Immunofluorescence and Electron Microscopy data collected only for diagnosis</b>                                                                                                                                                                                                                                                                                                                                                                                          |                                      |

**Supplemental Table 1.** Definitions of histological features standardised and scored in the study.

| <b>Definition</b>                             | <b>Reproducibility</b> | <b>Test</b> |
|-----------------------------------------------|------------------------|-------------|
| <i>Glomerular lesion</i>                      |                        |             |
| Mesangial hypercellularity                    | 0.86                   | ICC         |
| Increased cells in lumen                      | 0.79                   | ICC         |
| Increased cells in lumen with loop distension | 0.56                   | ICC         |
| Neutrophils                                   | 0.78                   | ICC         |
| GBM double contours                           | 0.67                   | ICC         |
| Segmental sclerosis                           | 0.8                    | ICC         |
| Mesangiolytic                                 | 0.12                   | ICC         |
| Cellular crescents                            | 0.57                   | ICC         |
| Fibrocellular crescents                       | 0.79                   | ICC         |
| Fibrous crescents                             | 0.6                    | ICC         |
| Normal glomeruli                              | 0.17                   | Kappa       |
| Ischemic changes                              | 0.32                   | Kappa       |
| Increased mesangial matrix                    | 0.34                   | Kappa       |
| Karyorrhexis                                  | 0.23                   | Kappa       |
| Visceral epithelial cell hypertrophy          | 0.07                   | Kappa       |
| Global sclerosis                              | 0.84                   | Kappa       |
| An adhesion                                   | 0.18                   | Kappa       |
| <i>Tubulointerstitial lesion</i>              |                        |             |
| Interstitial fibrosis                         | 0.88                   | ICC         |
| Tubular atrophy                               | 0.91                   | ICC         |
| Acute tubular injury                          | 0.75                   | ICC         |
| Interstitial inflammation (non-scarred areas) | 0.84                   | ICC         |
| Interstitial inflammation (scarred areas)     | 0.19                   | Kappa       |
| Tubulitis                                     | 0.32                   | Kappa       |
| <i>Vascular lesion</i>                        |                        |             |
| Interlobular intimal thickening               | 0.38                   | ICC         |
| Larger artery intimal thickening              | 0.54                   | ICC         |
| Arteriolar hyaline                            | 0.24                   | Kappa       |
| Non-hyaline arteriolar sclerosis              | 0.09                   | Kappa       |

Score reproducibility was assessed using intra-class correlation coefficients (ICC) or the Fleiss Kappa test (Kappa)

**Supplemental Table 2.** Reproducibility of histology scores.

| Active Score feature (max score = 24)            | Definition                                                                                                                             | Score                                                                   |
|--------------------------------------------------|----------------------------------------------------------------------------------------------------------------------------------------|-------------------------------------------------------------------------|
| Mesangial hypercellularity                       | Four or more nuclei in a mesangial area away from the hilum and not adjacent to an area of sclerosis or endocapillary hypercellularity | 0 = none 1 = 4-7 2 = >7                                                 |
| Endocapillary hypercellularity without occlusion | Increased cells in capillary lumens, without occlusion (% of capillary loops involved)                                                 | 0 = none 1 = 1 cell 2 = 1-10% 3 = 11-25% 4 = 26-50% 5 = 51-75% 6 = >75% |
| Endocapillary hypercellularity with occlusion    | Increased cells in capillary lumens, with occlusion (% of capillary loops involved)                                                    | 0 = none; 1 = 1-10%; 2 = 11-25%; 3 = 26-50%; 4 = 51-75%; 5 = >75%       |
| Neutrophils                                      | Neutrophils located in any location within the glomerulus. Number of neutrophils per glomerulus                                        | 0 = none; 1 = 1; 2 = 2-3; 3 = 4-10; 4 = >10                             |
| Cellular/fibrocellular crescents                 | % of glomeruli with cellular/fibrocellular crescents                                                                                   | 0 = none; 1 = 1-10%; 2 = 11-25%; 3 = 26-50%; 4 = >50%                   |
| Interstitial inflammation                        | % of cortical area involved with interstitial inflammation                                                                             | 0 = 0%; 1 = 10-20%; 2 = 30-50%; 3 = >50%                                |
| <b>Chronic Score feature (max score = 12)</b>    |                                                                                                                                        |                                                                         |
| Glomerular sclerosis                             | % of glomeruli with global or segmental sclerosis                                                                                      | 0 = <10%; 1 = 10-25%; 2 = 26-50%; 3 = >50%                              |
| Fibrous crescents                                | % of glomeruli with fibrous crescents                                                                                                  | 0 = 0; 1 = <25%; 2 = 26-50%; 3 = >50%                                   |
| Interstitial fibrosis                            | % of cortical area involved with interstitial fibrosis                                                                                 | 0 = 0%; 1 = 10-20%; 2 = 30-50%; 3 = >50%                                |
| Tubular atrophy                                  | % of cortical area involved with tubular atrophy                                                                                       | 0 = 0%; 1 = 10-20%; 2 = 30-50%; 3 = >50%                                |

Scoring of chronic changes informed by: Sethi S, D'Agati VD, Nast CC, et al. A proposal for standardized grading of chronic changes in native kidney biopsy specimens. *Kidney Int* 2017; 91: 787-789.

**Supplemental Table 3.** Definitions of Activity and Chronicity scores.

Supplemental Table 4. Joint model showing longitudinal change in proteinuria and the hazard of reaching an outcome event

| ALL COHORT                      |                          |                  |            |                 |              |        |
|---------------------------------|--------------------------|------------------|------------|-----------------|--------------|--------|
| Predictor                       | Reference                | log(OR) Estimate | log(OR) SD | log(OR) 95% CI  | P value      | OR     |
| Gender                          | Female                   | 0.925            | 0.867      | -0.728 - 2.673  | 0.276        |        |
| eGFR                            | NA*                      | -0.026           | 0.013      | -0.052 - -0.003 | <b>0.022</b> | 0.975  |
| Diagnosis                       | C3GN                     | -                | -          | -               | -            | -      |
| DDD                             |                          | 0.887            | 0.966      | -1.028 - 2.789  | 0.355        |        |
| Ig-MPGN                         |                          | -0.249           | 0.810      | -1.927 - 1.250  | 0.780        |        |
| Age                             | NA*                      | -0.020           | 0.019      | -0.057 - 0.020  | 0.301        |        |
| Immunosuppression use           | No immunosuppression use | 1.401            | 0.996      | -0.371 - 3.543  | 0.130        |        |
| IFTA                            | 0%                       | -                | -          | -               | -            | -      |
| 10-20%                          |                          | 2.746            | 0.962      | 0.963 - 4.745   | <b>0.002</b> | 15.579 |
| 30-50%                          |                          | 2.500            | 1.023      | 0.562 - 4.574   | <b>0.012</b> | 12.183 |
| >50%                            |                          | 2.952            | 1.481      | 0.105 - 5.946   | <b>0.042</b> | 19.144 |
| Cellular/fibrocellular Crescent | 0%                       | -                | -          | -               | -            | -      |
| 1-25%                           |                          | 0.872            | 0.696      | -0.467 - 2.257  | 0.204        |        |
| >25%                            |                          | -1.716           | 1.513      | -4.788 - 1.151  | 0.249        |        |
| Value (Proteinuria)             |                          | 0.683            | 0.296      | 0.192 - 1.349   | <b>0.002</b> | 1.980  |
| C3G COHORT                      |                          |                  |            |                 |              |        |
| Predictor                       | Reference                | log(OR) Estimate | log(OR) SD | log(OR) 95% CI  | P value      | OR     |
| Gender                          | Female                   | 1.162            | 0.945      | -0.597 - 3.116  | 0.205        |        |
| eGFR                            | NA*                      | -0.024           | 0.013      | -0.051 - -0.002 | <b>0.030</b> | 0.976  |
| Diagnosis                       | C3GN                     | -                | -          | -               | -            | -      |
| DDD                             |                          | -0.109           | 1.090      | -2.341 - 1.971  | 0.939        |        |
| Age                             | NA*                      | -0.003           | 0.022      | -0.046 - 0.042  | 0.881        |        |
| Immunosuppression use           | No immunosuppression use | 1.714            | 1.041      | -0.124 - 3.941  | 0.069        |        |
| IFTA                            | 0%                       | -                | -          | -               | -            | -      |
| 10-20%                          |                          | 4.475            | 1.380      | 1.931 - 7.359   | <b>0.000</b> | 87.784 |
| 30-50%                          |                          | 4.224            | 1.432      | 1.551 - 7.186   | <b>0.002</b> | 68.278 |
| >50%                            |                          | 4.477            | 1.688      | 1.313 - 7.938   | <b>0.006</b> | 87.932 |
| Cellular/fibrocellular Crescent | 0%                       | -                | -          | -               | -            | -      |
| 1-25%                           |                          | 0.820            | 0.786      | -0.653 - 2.458  | 0.280        |        |
| >25%                            |                          | 2.297            | 2.097      | -1.664 - 6.586  | 0.261        |        |
| Value (Proteinuria)             |                          | 0.590            | 0.343      | 0.088 - 1.430   | <b>0.014</b> | 1.804  |

NA\* - numerical values were used for age and eGFR rather than categories. eGFR - estimated glomerular filtration rate; DDD - dense deposit disease; C3GN - C3 glomerulonephritis  
IFTA - interstitial fibrosis and tubular atrophy; Ig-MPGN - immunoglobulin-associated membranoproliferative glomerulonephritis; OR - odds ratio; HR - hazard ratio; SD - standard deviation; CI - confidence interval

Supplemental Table 4. Joint model showing longitudinal change in proteinuria and the hazard of reaching an outcome event.



| Spearman rho                     |        |             |                     |                            |                     |                      |                   |             |                                  |                           |                     |                  |       |                   |
|----------------------------------|--------|-------------|---------------------|----------------------------|---------------------|----------------------|-------------------|-------------|----------------------------------|---------------------------|---------------------|------------------|-------|-------------------|
| VARIABLE                         | eGFR   | Proteinuria | Mesangial expansion | Mesangial hypercellularity | GBM double contours | EH without occlusion | EH with occlusion | Neutrophils | Cellular/fibrocellular crescents | Interstitial inflammation | Segmental sclerosis | Global sclerosis | IFTA  | Fibrous crescents |
| eGFR                             | 1      |             |                     |                            |                     |                      |                   |             |                                  |                           |                     |                  |       |                   |
| Proteinuria                      | 0.001  | 1           |                     |                            |                     |                      |                   |             |                                  |                           |                     |                  |       |                   |
| Mesangial expansion              | 0.336  | 0.262       | 1                   |                            |                     |                      |                   |             |                                  |                           |                     |                  |       |                   |
| Mesangial hypercellularity       | 0.334  | 0.247       | 0.900               | 1                          |                     |                      |                   |             |                                  |                           |                     |                  |       |                   |
| GBM double contours              | 0.233  | 0.292       | 0.629               | 0.589                      | 1                   |                      |                   |             |                                  |                           |                     |                  |       |                   |
| EH without occlusion             | 0.104  | 0.233       | 0.269               | 0.273                      | 0.123               | 1                    |                   |             |                                  |                           |                     |                  |       |                   |
| EH with occlusion                | 0.077  | 0.225       | 0.249               | 0.240                      | 0.248               | 0.095                | 1                 |             |                                  |                           |                     |                  |       |                   |
| Neutrophils                      | 0.157  | 0.214       | 0.296               | 0.342                      | 0.174               | 0.302                | 0.308             | 1           |                                  |                           |                     |                  |       |                   |
| Cellular/fibrocellular crescents | -0.307 | 0.252       | -0.256              | -0.196                     | -0.193              | -0.043               | 0.265             | 0.026       | 1                                |                           |                     |                  |       |                   |
| Interstitial inflammation        | -0.287 | 0.128       | -0.104              | -0.026                     | -0.079              | 0.158                | 0.174             | 0.114       | 0.402                            | 1                         |                     |                  |       |                   |
| Segmental sclerosis              | -0.084 | 0.099       | 0.304               | 0.322                      | 0.190               | 0.037                | -0.331            | 0.019       | -0.065                           | -0.063                    | 1                   |                  |       |                   |
| Global sclerosis                 | -0.388 | -0.093      | 0.018               | -0.030                     | -0.058              | -0.179               | -0.195            | -0.051      | -0.109                           | -0.083                    | 0.396               | 1                |       |                   |
| IFTA                             | -0.519 | -0.007      | 0.081               | 0.037                      | 0.000               | -0.141               | -0.229            | -0.100      | 0.000                            | -0.017                    | 0.484               | 0.703            | 1     |                   |
| Fibrous crescents                | -0.147 | -0.028      | 0.010               | 0.013                      | -0.077              | 0.005                | -0.081            | 0.095       | 0.132                            | 0.113                     | 0.304               | 0.209            | 0.408 | 1                 |

  

| P-value                          |       |             |                     |                            |                     |                      |                   |             |                                  |                           |                     |                  |       |                   |
|----------------------------------|-------|-------------|---------------------|----------------------------|---------------------|----------------------|-------------------|-------------|----------------------------------|---------------------------|---------------------|------------------|-------|-------------------|
| VARIABLE                         | eGFR  | Proteinuria | Mesangial expansion | Mesangial hypercellularity | GBM double contours | EH without occlusion | EH with occlusion | Neutrophils | Cellular/fibrocellular crescents | Interstitial inflammation | Segmental sclerosis | Global sclerosis | IFTA  | Fibrous crescents |
| eGFR                             | NA    |             |                     |                            |                     |                      |                   |             |                                  |                           |                     |                  |       |                   |
| Proteinuria                      | 0.994 | NA          |                     |                            |                     |                      |                   |             |                                  |                           |                     |                  |       |                   |
| Mesangial expansion              | 0.000 | 0.002       | NA                  |                            |                     |                      |                   |             |                                  |                           |                     |                  |       |                   |
| Mesangial hypercellularity       | 0.000 | 0.003       | 0.000               | NA                         |                     |                      |                   |             |                                  |                           |                     |                  |       |                   |
| GBM double contours              | 0.004 | 0.000       | 0.000               | 0.000                      | NA                  |                      |                   |             |                                  |                           |                     |                  |       |                   |
| EH without occlusion             | 0.198 | 0.006       | 0.001               | 0.001                      | 0.126               | NA                   |                   |             |                                  |                           |                     |                  |       |                   |
| EH with occlusion                | 0.339 | 0.000       | 0.002               | 0.003                      | 0.002               | 0.236                | NA                |             |                                  |                           |                     |                  |       |                   |
| Neutrophils                      | 0.050 | 0.011       | 0.000               | 0.000                      | 0.030               | 0.000                | 0.000             | NA          |                                  |                           |                     |                  |       |                   |
| Cellular/fibrocellular crescents | 0.000 | 0.003       | 0.001               | 0.014                      | 0.016               | 0.590                | 0.001             | 0.749       | NA                               |                           |                     |                  |       |                   |
| Interstitial inflammation        | 0.000 | 0.133       | 0.195               | 0.751                      | 0.326               | 0.049                | 0.030             | 0.158       | 0.000                            | NA                        |                     |                  |       |                   |
| Segmental sclerosis              | 0.297 | 0.246       | 0.000               | 0.000                      | 0.017               | 0.644                | 0.000             | 0.813       | 0.417                            | 0.434                     | NA                  |                  |       |                   |
| Global sclerosis                 | 0.000 | 0.273       | 0.827               | 0.711                      | 0.473               | 0.026                | 0.015             | 0.526       | 0.177                            | 0.304                     | 0.000               | NA               |       |                   |
| IFTA                             | 0.000 | 0.933       | 0.317               | 0.646                      | 0.996               | 0.080                | 0.004             | 0.215       | 0.999                            | 0.832                     | 0.000               | 0.000            | NA    |                   |
| Fibrous crescents                | 0.068 | 0.746       | 0.905               | 0.873                      | 0.340               | 0.951                | 0.915             | 0.237       | 0.102                            | 0.162                     | 0.000               | 0.009            | 0.000 | NA                |

  

| Number of pair-wise comparisons  |      |             |                     |                            |                     |                      |                   |             |                                  |                           |                     |                  |      |                   |
|----------------------------------|------|-------------|---------------------|----------------------------|---------------------|----------------------|-------------------|-------------|----------------------------------|---------------------------|---------------------|------------------|------|-------------------|
| VARIABLE                         | eGFR | Proteinuria | Mesangial expansion | Mesangial hypercellularity | GBM double contours | EH without occlusion | EH with occlusion | Neutrophils | Cellular/fibrocellular crescents | Interstitial inflammation | Segmental sclerosis | Global sclerosis | IFTA | Fibrous crescents |
| eGFR                             | 155  |             |                     |                            |                     |                      |                   |             |                                  |                           |                     |                  |      |                   |
| Proteinuria                      | 140  | 140         |                     |                            |                     |                      |                   |             |                                  |                           |                     |                  |      |                   |
| Mesangial expansion              | 155  | 140         | 156                 |                            |                     |                      |                   |             |                                  |                           |                     |                  |      |                   |
| Mesangial hypercellularity       | 155  | 140         | 156                 | 156                        |                     |                      |                   |             |                                  |                           |                     |                  |      |                   |
| GBM double contours              | 155  | 140         | 156                 | 156                        | 156                 |                      |                   |             |                                  |                           |                     |                  |      |                   |
| EH without occlusion             | 155  | 140         | 156                 | 156                        | 156                 | 156                  |                   |             |                                  |                           |                     |                  |      |                   |
| EH with occlusion                | 155  | 140         | 156                 | 156                        | 156                 | 156                  | 156               |             |                                  |                           |                     |                  |      |                   |
| Neutrophils                      | 155  | 140         | 156                 | 156                        | 156                 | 156                  | 156               | 156         |                                  |                           |                     |                  |      |                   |
| Cellular/fibrocellular crescents | 155  | 140         | 156                 | 156                        | 156                 | 156                  | 156               | 156         | 156                              |                           |                     |                  |      |                   |
| Interstitial inflammation        | 155  | 140         | 156                 | 156                        | 156                 | 156                  | 156               | 156         | 156                              | 156                       |                     |                  |      |                   |
| Segmental sclerosis              | 155  | 140         | 156                 | 156                        | 156                 | 156                  | 156               | 156         | 156                              | 156                       | 156                 |                  |      |                   |
| Global sclerosis                 | 155  | 140         | 156                 | 156                        | 156                 | 156                  | 156               | 156         | 156                              | 156                       | 156                 | 156              |      |                   |
| IFTA                             | 155  | 140         | 156                 | 156                        | 156                 | 156                  | 156               | 156         | 156                              | 156                       | 156                 | 156              | 156  |                   |
| Fibrous crescents                | 155  | 140         | 156                 | 156                        | 156                 | 156                  | 156               | 156         | 156                              | 156                       | 156                 | 156              | 156  | 156               |

Light green shaded cells denotes significant P values before correction for multiple comparison testing; dark green shaded cells denote significant P values after adjusting for multiple comparison testing using Holm-Sidak procedure (α=0.0078)

eGFR - estimated glomerular filtration rate; EH - endothocillary hypercellularity; GBM - glomerular basement membrane; IFTA - interstitial fibrosis and tubular atrophy

**Supplemental Table 5.** Correlations between eGFR and Proteinuria and histology features in the whole cohort.

| Spearman Rho                     |        |             |                     |                            |                     |                      |                   |             |                                  |                           |                     |                  |       |                   |
|----------------------------------|--------|-------------|---------------------|----------------------------|---------------------|----------------------|-------------------|-------------|----------------------------------|---------------------------|---------------------|------------------|-------|-------------------|
| VARIABLE                         | eGFR   | Proteinuria | Mesangial expansion | Mesangial hypercellularity | GBM double contours | EH without occlusion | EH with occlusion | Neutrophils | Cellular/fibrocellular crescents | Interstitial Inflammation | Segmental sclerosis | Global sclerosis | IFTA  | Fibrous crescents |
| eGFR                             | 1      |             |                     |                            |                     |                      |                   |             |                                  |                           |                     |                  |       |                   |
| Proteinuria                      | 0.008  | 1           |                     |                            |                     |                      |                   |             |                                  |                           |                     |                  |       |                   |
| Mesangial expansion              | 0.273  | 0.315       | 1                   |                            |                     |                      |                   |             |                                  |                           |                     |                  |       |                   |
| Mesangial hypercellularity       | 0.298  | 0.329       | 0.895               | 1                          |                     |                      |                   |             |                                  |                           |                     |                  |       |                   |
| GBM double contours              | 0.228  | 0.364       | 0.691               | 0.629                      | 1                   |                      |                   |             |                                  |                           |                     |                  |       |                   |
| EH without occlusion             | 0.109  | 0.174       | 0.376               | 0.338                      | 0.224               | 1                    |                   |             |                                  |                           |                     |                  |       |                   |
| EH with occlusion                | 0.100  | 0.447       | 0.245               | 0.255                      | 0.245               | 0.178                | 1                 |             |                                  |                           |                     |                  |       |                   |
| Neutrophils                      | 0.188  | 0.231       | 0.315               | 0.375                      | 0.230               | 0.520                | 0.446             | 1           |                                  |                           |                     |                  |       |                   |
| Cellular/fibrocellular crescents | -0.258 | 0.247       | -0.299              | -0.194                     | -0.205              | -0.024               | 0.217             | -0.026      | 1                                |                           |                     |                  |       |                   |
| Interstitial Inflammation        | -0.179 | 0.130       | -0.073              | 0.011                      | -0.108              | 0.174                | 0.152             | 0.130       | 0.412                            | 1                         |                     |                  |       |                   |
| Segmental sclerosis              | -0.104 | 0.151       | 0.332               | 0.378                      | 0.281               | -0.035               | -0.283            | -0.006      | -0.054                           | -0.061                    | 1                   |                  |       |                   |
| Global sclerosis                 | -0.434 | -0.081      | 0.006               | -0.041                     | -0.079              | -0.235               | -0.219            | -0.131      | -0.160                           | -0.147                    | 0.429               | 1                |       |                   |
| IFTA                             | -0.510 | 0.027       | 0.098               | 0.051                      | 0.028               | -0.217               | -0.244            | -0.180      | -0.065                           | -0.151                    | 0.514               | 0.708            | 1     |                   |
| Fibrous crescents                | -0.083 | -0.073      | 0.029               | 0.044                      | 0.001               | -0.098               | -0.049            | 0.039       | 0.076                            | 0.069                     | 0.297               | 0.171            | 0.349 | 1                 |

  

| P-value                          |       |             |                     |                            |                     |                      |                   |             |                                  |                           |                     |                  |       |                   |
|----------------------------------|-------|-------------|---------------------|----------------------------|---------------------|----------------------|-------------------|-------------|----------------------------------|---------------------------|---------------------|------------------|-------|-------------------|
| VARIABLE                         | eGFR  | Proteinuria | Mesangial expansion | Mesangial hypercellularity | GBM double contours | EH without occlusion | EH with occlusion | Neutrophils | Cellular/fibrocellular crescents | Interstitial Inflammation | Segmental sclerosis | Global sclerosis | IFTA  | Fibrous crescents |
| eGFR                             | NA    |             |                     |                            |                     |                      |                   |             |                                  |                           |                     |                  |       |                   |
| Proteinuria                      | 0.935 | NA          |                     |                            |                     |                      |                   |             |                                  |                           |                     |                  |       |                   |
| Mesangial expansion              | 0.002 | 0.001       | NA                  |                            |                     |                      |                   |             |                                  |                           |                     |                  |       |                   |
| Mesangial hypercellularity       | 0.001 | 0.000       | 0.000               | NA                         |                     |                      |                   |             |                                  |                           |                     |                  |       |                   |
| GBM double contours              | 0.011 | 0.000       | 0.000               | 0.000                      | NA                  |                      |                   |             |                                  |                           |                     |                  |       |                   |
| EH without occlusion             | 0.234 | 0.068       | 0.000               | 0.000                      | 0.013               | NA                   |                   |             |                                  |                           |                     |                  |       |                   |
| EH with occlusion                | 0.273 | 0.000       | 0.006               | 0.004                      | 0.006               | 0.048                | NA                |             |                                  |                           |                     |                  |       |                   |
| Neutrophils                      | 0.038 | 0.015       | 0.000               | 0.000                      | 0.011               | 0.000                | 0.000             | NA          |                                  |                           |                     |                  |       |                   |
| Cellular/fibrocellular crescents | 0.004 | 0.009       | 0.001               | 0.031                      | 0.023               | 0.792                | 0.016             | 0.773       | NA                               |                           |                     |                  |       |                   |
| Interstitial Inflammation        | 0.048 | 0.176       | 0.424               | 0.905                      | 0.233               | 0.054                | 0.092             | 0.151       | 0.000                            | NA                        |                     |                  |       |                   |
| Segmental sclerosis              | 0.254 | 0.116       | 0.000               | 0.000                      | 0.002               | 0.704                | 0.001             | 0.945       | 0.556                            | 0.502                     | NA                  |                  |       |                   |
| Global sclerosis                 | 0.000 | 0.400       | 0.947               | 0.651                      | 0.386               | 0.009                | 0.015             | 0.150       | 0.076                            | 0.105                     | 0.000               | NA               |       |                   |
| IFTA                             | 0.000 | 0.780       | 0.278               | 0.573                      | 0.763               | 0.016                | 0.007             | 0.046       | 0.472                            | 0.095                     | 0.000               | 0.000            | NA    |                   |
| Fibrous crescents                | 0.365 | 0.448       | 0.748               | 0.629                      | 0.990               | 0.279                | 0.592             | 0.665       | 0.404                            | 0.440                     | 0.001               | 0.059            | 0.000 | NA                |

  

| Number of pair-wise comparisons  |      |             |                     |                            |                     |                      |                   |             |                                  |                           |                     |                  |      |                   |
|----------------------------------|------|-------------|---------------------|----------------------------|---------------------|----------------------|-------------------|-------------|----------------------------------|---------------------------|---------------------|------------------|------|-------------------|
| VARIABLE                         | eGFR | Proteinuria | Mesangial expansion | Mesangial hypercellularity | GBM double contours | EH without occlusion | EH with occlusion | Neutrophils | Cellular/fibrocellular crescents | Interstitial Inflammation | Segmental sclerosis | Global sclerosis | IFTA | Fibrous crescents |
| eGFR                             | 122  |             |                     |                            |                     |                      |                   |             |                                  |                           |                     |                  |      |                   |
| Proteinuria                      | 110  | 110         |                     |                            |                     |                      |                   |             |                                  |                           |                     |                  |      |                   |
| Mesangial expansion              | 122  | 110         | 123                 |                            |                     |                      |                   |             |                                  |                           |                     |                  |      |                   |
| Mesangial hypercellularity       | 122  | 110         | 123                 | 123                        |                     |                      |                   |             |                                  |                           |                     |                  |      |                   |
| GBM double contours              | 122  | 110         | 123                 | 123                        | 123                 |                      |                   |             |                                  |                           |                     |                  |      |                   |
| EH without occlusion             | 122  | 110         | 123                 | 123                        | 123                 | 123                  |                   |             |                                  |                           |                     |                  |      |                   |
| EH with occlusion                | 122  | 110         | 123                 | 123                        | 123                 | 123                  | 123               |             |                                  |                           |                     |                  |      |                   |
| Neutrophils                      | 122  | 110         | 123                 | 123                        | 123                 | 123                  | 123               | 123         |                                  |                           |                     |                  |      |                   |
| Cellular/fibrocellular crescents | 122  | 110         | 123                 | 123                        | 123                 | 123                  | 123               | 123         | 123                              |                           |                     |                  |      |                   |
| Interstitial Inflammation        | 122  | 110         | 123                 | 123                        | 123                 | 123                  | 123               | 123         | 123                              | 123                       |                     |                  |      |                   |
| Segmental sclerosis              | 122  | 110         | 123                 | 123                        | 123                 | 123                  | 123               | 123         | 123                              | 123                       | 123                 |                  |      |                   |
| Global sclerosis                 | 122  | 110         | 123                 | 123                        | 123                 | 123                  | 123               | 123         | 123                              | 123                       | 123                 | 123              |      |                   |
| IFTA                             | 122  | 110         | 123                 | 123                        | 123                 | 123                  | 123               | 123         | 123                              | 123                       | 123                 | 123              | 123  |                   |
| Fibrous crescents                | 122  | 110         | 123                 | 123                        | 123                 | 123                  | 123               | 123         | 123                              | 123                       | 123                 | 123              | 123  | 123               |

Light green shaded cells denotes significant P values before correction for multiple comparison testing; dark green shaded cells denote significant P values after adjusting for multiple comparison testing using Holm-Sidak procedure ( $\alpha=0.00072$ )  
eGFR - estimated glomerular filtration rate; EH - endocapillary hypercellularity; GBM - glomerular basement membrane; IFTA - interstitial fibrosis and tubular atrophy

**Supplemental Table 6.** Correlations between eGFR and Proteinuria and histology features in C3G cohort only.

| ALL COHORT                 |                          | eGFR (ml/min per 1.73m <sup>2</sup> ; n=155) |                                                    |                   | Proteinuria (g/24hr; n=140) |                   |                                                    |                   |
|----------------------------|--------------------------|----------------------------------------------|----------------------------------------------------|-------------------|-----------------------------|-------------------|----------------------------------------------------|-------------------|
| Biopsy Feature             | Univariable - B (95% CI) | P value                                      | Multivariable - B (95% CI), r <sup>2</sup> = 0.505 | P value           | Univariable - B (95% CI)    | P value           | Multivariable - B (95% CI), r <sup>2</sup> = 0.255 | P value           |
| Global sclerosis           | -0.780 (-1.113 - -0.448) | <b>&lt;0.0001</b>                            | 0.094 (-0.274-0.462)                               | 0.62              | -0.032 (-0.076-0.012)       | 0.15              |                                                    |                   |
| Mesangial expansion        | 20.773 (10.610-30.936)   | <b>&lt;0.0001</b>                            |                                                    |                   | 1.975 (0.624-3.327)         | <b>0.00</b>       |                                                    |                   |
| Mesangial hypercellularity | 25.932 (13.754-38.109)   | <b>&lt;0.0001</b>                            | 29.206 (18.044-40.369)                             | <b>&lt;0.0001</b> | 2.076 (0.441-3.710)         | <b>0.01</b>       | -0.814 (-2.767-1.140)                              | 0.41              |
| EH without occlusion       | 4.503 (-4.551-13.558)    | 0.33                                         |                                                    |                   | 1.657 (0.434-2.880)         | <b>0.01</b>       | 1.624 (0.331-2.918)                                | <b>0.01</b>       |
| EH with occlusion          | 0.341 (-4.572-5.255)     | 0.89                                         |                                                    |                   | 1.444 (0.860-2.028)         | <b>&lt;0.0001</b> | 1.273 (0.640-1.907)                                | <b>&lt;0.0001</b> |
| Neutrophils                | 6.757 (-3.263-16.777)    | 0.19                                         |                                                    |                   | 2.391 (1.086-3.695)         | <b>&lt;0.0001</b> | 0.738 (-0.743-2.219)                               | 0.33              |
| GBM Double contours        | 7.039 (1.202-12.877)     | <b>0.02</b>                                  | -2.681 (-7.933-2.570)                              | 0.32              | 1.316 (0.568-2.063)         | <b>0.00</b>       | 1.082 (0.218-1.945)                                | <b>0.01</b>       |
| Segmental sclerosis        | -0.247 (-0.531- 0.037)   | 0.09                                         |                                                    |                   | 0.008 (-0.029-0.046)        | 0.66              |                                                    |                   |
| Crescent (C or FC)         | -0.754 (-1.107- -0.400)  | <b>&lt;0.0001</b>                            | -0.439 (-0.759- -0.119)                            | <b>0.01</b>       | 0.037 (-0.016-0.089)        | 0.17              |                                                    |                   |
| IFTA                       | -0.926 (-1.170- -0.682)  | <b>&lt;0.0001</b>                            | -1.032 (-1.356- -0.708)                            | <b>&lt;0.0001</b> | -0.001 (-0.037-0.035)       | 0.95              |                                                    |                   |
| Interstitial Inflammation  | -0.697 (-1.032- -0.362)  | <b>&lt;0.0001</b>                            | -0.483 (-0.786- -0.180)                            | <b>0.00</b>       | 0.022 (-0.024-0.069)        | 0.35              |                                                    |                   |
| Fibrous crescents          | -0.834 (-1.428- -0.240)  | <b>0.01</b>                                  | 0.220 (-0.295-0.736)                               | 0.40              | -0.007 (-0.082-0.068)       | 0.85              |                                                    |                   |
| C3G COHORT                 |                          | eGFR (ml/min per 1.73m <sup>2</sup> ; n=122) |                                                    |                   | Proteinuria (g/24hr; n=110) |                   |                                                    |                   |
| Biopsy Feature             | Univariable - B (95% CI) | P value                                      | Multivariable - B (95% CI), r <sup>2</sup> = 0.486 | P value           | Univariable - B (95% CI)    | P value           | Multivariable - B (95% CI), r <sup>2</sup> = 0.295 | P value           |
| Global sclerosis           | -0.829 (-1.182- -0.477)  | <b>&lt;0.0001</b>                            | 0.076 (-0.339-0.492)                               | 0.72              | -0.047 (-0.095-0.002)       | 0.06              |                                                    |                   |
| Mesangial expansion        | 18.850 (7.199-30.500)    | <b>0.00</b>                                  |                                                    |                   | 2.317 (0.738-3.897)         | <b>0.00</b>       |                                                    |                   |
| Mesangial hypercellularity | 23.734 (9.562-37.906)    | <b>0.00</b>                                  | 25.773 (14.525-37.020)                             | <b>&lt;0.0001</b> | 2.718 (0.796-4.641)         | <b>0.01</b>       | -0.217 (-2.437-2.004)                              | 0.85              |
| EH without occlusion       | 4.361 (-5.714-14.436)    | 0.39                                         |                                                    |                   | 1.408 (-0.034-2.849)        | 0.06              |                                                    |                   |
| EH with occlusion          | 1.058 (-4.787-6.903)     | 0.72                                         |                                                    |                   | 1.749 (1.033-2.465)         | <b>&lt;0.0001</b> | 1.373 (0.607-2.139)                                | <b>0.00</b>       |
| Neutrophils                | 7.903 (-3.005-18.811)    | 0.15                                         |                                                    |                   | 2.312 (0.833-3.791)         | <b>0.00</b>       | 0.643 (-0.948-2.234)                               | 0.43              |
| GBM Double contours        | 5.738 (-1.646-13.123)    | 0.13                                         |                                                    |                   | 2.185 (1.231-3.139)         | <b>&lt;0.0001</b> | 1.873 (0.775-2.971)                                | <b>0.00</b>       |
| Segmental sclerosis        | -0.256 (-0.571-0.058)    | 0.11                                         |                                                    |                   | 0.009 (-0.033-0.052)        | 0.66              |                                                    |                   |
| Crescent (C or FC)         | -0.705 (-1.112- -0.297)  | <b>0.00</b>                                  | -0.396 (-0.776- -0.017)                            | <b>0.04</b>       | 0.047 (-0.018-0.112)        | 0.16              |                                                    |                   |
| IFTA                       | -0.936 (-1.210- -0.663)  | <b>&lt;0.0001</b>                            | -1.093 (-1.473- -0.713)                            | <b>&lt;0.0001</b> | -0.002 (-0.043-0.040)       | 0.94              |                                                    |                   |
| Interstitial Inflammation  | -0.536 (-0.948- -0.124)  | <b>0.01</b>                                  | -0.503 (-0.880- -0.126)                            | <b>0.01</b>       | 0.03 (-0.028-0.089)         | 0.31              |                                                    |                   |
| Fibrous crescents          | -0.731 (-1.382- -0.080)  | <b>0.03</b>                                  | 0.246 (-0.316-0.807)                               | 0.38              | -0.018 (-0.103-0.067)       | 0.68              |                                                    |                   |

Supplemental Table 7. Regression of histological features with eGFR and proteinuria at time of biopsy

| <b>Indication for second biopsy (B2)</b>       | <b>No of patients</b> |
|------------------------------------------------|-----------------------|
| Deterioration while taking immunosuppression   | 13 (33%)              |
| Deterioration without taking immunosuppression | 20 (51%)              |
| Stable while taking immunosuppression          | 4 (10%)               |
| Other/stable without taking immunosuppression  | 2 (5%)                |

**Supplemental Table 8.** Indications for repeat (B2) biopsy in 39 patients

| Participant | B1 indication                                                                           | B2 indication                                               | Time between B1 and B2 (months) |
|-------------|-----------------------------------------------------------------------------------------|-------------------------------------------------------------|---------------------------------|
| Case #1     | Nephrotic syndrome following flu-like illness.                                          | Decreasing C3 level, rising creatinine.                     | 4                               |
| Case #2     | Presented with nephrotic syndrome, previously well.                                     | No improvement since initial biopsy, second opinion sought. | 38                              |
| Case #3     | Acute renal failure, active urinary sediment, recent upper respiratory tract infection. | Clinical concern for relapse.                               | 21                              |

**Supplemental Table 9.** Indications for native kidney baseline (B1) and repeat (B2) biopsy where diagnosis changed from Ig-MPGN to C3G.

| ALL COHORT                 |                                             |              |                                                   |                   |                             |         |                   |         |  |
|----------------------------|---------------------------------------------|--------------|---------------------------------------------------|-------------------|-----------------------------|---------|-------------------|---------|--|
| Biopsy Feature             | eGFR (ml/min per 1.73m <sup>2</sup> ; n=37) |              |                                                   |                   | Proteinuria (g/24hr; n=30)  |         |                   |         |  |
|                            | Univariate - B (95% CI)                     | P value      | Multivariate - B (95% CI), r <sup>2</sup> = 0.550 | P value           | Univariate - B (95% CI)     | P value | Multivariate (NA) | P value |  |
| Global sclerosis           | -0.462(-0.872-0.052)                        | <b>0.028</b> | 0.112(-0.321-0.546)                               | 0.601             | 0.017(-0.093-0.127)         | 0.755   |                   |         |  |
| Mesangial expansion        | 14.010( 3.341-31.361)                       | 0.110        |                                                   |                   | -0.098(-3.543-3.348)        | 0.954   |                   |         |  |
| Mesangial hypercellularity | 9.686(-10.792-30.164)                       | 0.344        |                                                   |                   | 0.576(-3.255-4.407)         | 0.76    |                   |         |  |
| EH without occlusion       | 8.326(-10.195-26.848)                       | 0.368        |                                                   |                   | -0.397(-4.118-3.323)        | 0.828   |                   |         |  |
| EH with occlusion          | -8.168(-18.149-1.778)                       | 0.104        |                                                   |                   | 1.135(-0.736-3.007)         | 0.224   |                   |         |  |
| Neutrophils                | 0.853(-23.960-25.665)                       | 0.945        |                                                   |                   | 0.181(-3.737-4.099)         | 0.925   |                   |         |  |
| GBM Double contours        | 3.112(-6.635-12.860)                        | 0.521        |                                                   |                   | -0.225(-2.110-1.660)        | 0.809   |                   |         |  |
| Segmental sclerosis        | -0.175(-0.597-0.247)                        | 0.405        |                                                   |                   | -0.020(-0.096-0.057)        | 0.602   |                   |         |  |
| Crescent (C or FC)         | -0.600(-1.160-0.040)                        | <b>0.036</b> | -0.406(-0.838-0.025)                              | 0.064             | 0.013(-0.247-0.273)         | 0.918   |                   |         |  |
| IFTA                       | -0.779(-1.240-0.318)                        | <b>0.002</b> | -0.873(-1.397-0.348)                              | <b>0.002</b>      | -0.001(-0.102-0.100)        | 0.986   |                   |         |  |
| Interstitial Inflammation  | -0.772(-1.299-0.245)                        | <b>0.005</b> | -0.839(-1.259-0.419)                              | <b>&lt;0.0001</b> | 0.09(-0.017-0.196)          | 0.095   |                   |         |  |
| Fibrous crescents          | -0.586(-2.363-1.190)                        | 0.507        |                                                   |                   | 0.037(-0.278-0.352)         | 0.812   |                   |         |  |
| C3G COHORT                 |                                             |              |                                                   |                   |                             |         |                   |         |  |
| Biopsy Feature             | eGFR (ml/min per 1.73m <sup>2</sup> ; n=29) |              |                                                   |                   | Proteinuria (g/24hr; n=110) |         |                   |         |  |
|                            | Univariate - B (95% CI)                     | P value      | Multivariate - B (95% CI), r <sup>2</sup> = 0.485 | P value           | Univariate - B (95% CI)     | P value | Multivariate (NA) | P value |  |
| Global sclerosis           | -0.545(-1.017-0.073)                        | <b>0.025</b> | 0.051(-0.461-0.563)                               | 0.840             | 0.017(-0.110-0.144)         | 0.786   |                   |         |  |
| Mesangial expansion        | 13.580(-5.485-32.646)                       | 0.155        |                                                   |                   | 0.752(-3.221-4.724)         | 0.7     |                   |         |  |
| Mesangial hypercellularity | 5.276(-19.091-29.643)                       | 0.660        |                                                   |                   | 2.322(-2.284-6.927)         | 0.309   |                   |         |  |
| EH without occlusion       | 12.163(-9.106-33.433)                       | 0.251        |                                                   |                   | -1.894(-6.346-2.558)        | 0.389   |                   |         |  |
| EH with occlusion          | -4.227(-19.044-10.591)                      | 0.563        |                                                   |                   | 1.211(-1.531-3.953)         | 0.371   |                   |         |  |
| Neutrophils                | 8.895(-18.518-36.309)                       | 0.511        |                                                   |                   | -0.697(-5.055-3.661)        | 0.744   |                   |         |  |
| GBM Double contours        | 4.167(-7.133-15.466)                        | 0.456        |                                                   |                   | -0.071(-2.183-2.041)        | 0.945   |                   |         |  |
| Segmental sclerosis        | -0.179(-0.638-0.279)                        | 0.430        |                                                   |                   | -0.019(-0.103-0.065)        | 0.648   |                   |         |  |
| Crescent (C or FC)         | -0.518(-1.107-0.071)                        | 0.082        |                                                   |                   | -0.059(-0.402-0.284)        | 0.727   |                   |         |  |
| IFTA                       | -0.909(-1.412-0.407)                        | <b>0.001</b> | -0.853(-1.443-0.262)                              | <b>0.006</b>      | -0.001(-0.115-0.114)        | 0.992   |                   |         |  |
| Interstitial Inflammation  | -1.051(-1.945-0.266)                        | <b>0.011</b> | -0.892(-1.591-0.194)                              | <b>0.014</b>      | 0.138(-0.056-0.331)         | 0.155   |                   |         |  |
| Fibrous crescents          | -0.436(-2.315-1.443)                        | 0.638        |                                                   |                   | 0.033(-0.301-0.367)         | 0.841   |                   |         |  |

**Supplemental Table 10.** Regression of histological features with eGFR and proteinuria at the time of a first repeat native biopsy.
